1                    Ischemic Preconditioning and Left Ventricular Dysfunction:  
2                    A Novel Mechanism & Model for Pulseless Electrical Activity

3  
4    **Short Title:** Animal Model of Ischemic Pulseless Electrical Activity Cardiac Arrest

5    **Authors:** Kaustubha D Patil MD<sup>1</sup>, Richard S Tunin MS<sup>1</sup>, Sarah J Fink MS<sup>1</sup>, Susumu Tao MD  
6    PhD<sup>1</sup>, Henry R Halperin MD MA<sup>1,2</sup>

7    **Word Count** (introduction through acknowledgements and figure captions): 4518

8    **Affiliations:**

9    <sup>1</sup>Johns Hopkins University, Division of Cardiology, Department of Medicine, Baltimore, MD.

10   <sup>2</sup> Johns Hopkins University Departments of Biomedical Engineering and Radiology, Baltimore,  
11   MD.

12   **Funding:** This study was supported by R01HL126092 and a grant from Zoll Circulation.

13  
14   **Address for Correspondence**

15                    Kaustubha Patil, MD

16                    Johns Hopkins Hospital

17                    1800 Orleans Street

18                    Zayed 7122

19                    Baltimore, MD 21287

20                    Phone: 614-592-5867

21                    Fax: 410-367-2406

22                    E-mail: [kpatil2@jhmi.edu](mailto:kpatil2@jhmi.edu)

23

24

25

26 **Abstract**

27 **Background:** Pulseless electrical activity (PEA) is a very common rhythm in cardiac arrest and  
28 survival is  $\approx 5\%$ . Population data suggest coronary ischemia significantly contributes to PEA,  
29 but the mechanism is unknown.

30 **Objectives:** We hypothesize ischemic preconditioning (IPC) in the setting of left ventricular  
31 (LV) dysfunction can convert ischemia-induced ventricular fibrillation (VF) into ischemia-  
32 induced PEA.

33 **Methods:** Using percutaneous coronary interventions in anesthetized swine, we studied the  
34 effect of IPC prior to ischemia on arrhythmic burden in normal animals and in animals with LV  
35 dysfunction. IPC protocol: four cycles of three minutes of coronary occlusion followed by seven  
36 minutes of reperfusion. Chronic LV dysfunction protocol: two serial infarcts in two coronary  
37 territories, separated by one week of recovery.

38 **Results:** In normal animals, IPC prior to ischemia significantly reduced VF incidence (2/8 IPC  
39 vs. 7/8 control). In IPC animals with VF, the time to VF was significantly delayed ( $37.2 \pm 7.3$   
40 min vs.  $20.7 \pm 4.9$  min,  $p < 0.005$ ). In chronic LV dysfunction animals (EF  $15\% \pm 5\%$ ), ischemia  
41 caused PEA in all animals (18/18). In non-preconditioned animals, VF followed PEA in all cases  
42 (12/12). In preconditioned animals, PEA sustained without VF in 2/6 animals. In 4/6 animals,  
43 PEA was prolonged and time to VF was significantly delayed compared to non-preconditioned  
44 animals ( $33.7 \pm 7.8$  min vs.  $12.2 \pm 5.0$  min,  $p < 0.0001$ ).

45 **Conclusion:** IPC delays/prevents VF. IPC with LV dysfunction prior to ischemia produces  
46 prolonged PEA. IPC with LV dysfunction prior to ischemia is likely an important mechanism for  
47 human PEA arrest. This is the first animal model of ischemic pulseless electrical activity.

48

49  
50  
51  
52  
53  
54  
55  
56  
57  
58  
59  
60  
61  
62  
63  
64  
65  
66  
67  
68  
69  
70  
71  
72  
73  
74

**Key words:** pulseless electrical activity, sudden cardiac death, cardiomyopathy, coronary artery disease

**Abbreviations:**

- VT: ventricular tachycardia
- VF: ventricular fibrillation
- PEA: pulseless electrical activity
- IPC: ischemic preconditioning
- LV: left ventricle
- LAD: left anterior descending
- RCA: right coronary artery
- LCX: left circumflex
- ACLS: advanced cardiac life support
- RH: reactive hyperemia
- ECG: electrocardiogram
- MAP: mean arterial pressure

75 **Introduction**

76 There are over 500,000 victims of cardiac arrest each year in the United States (300,000  
77 out-of-hospital; 200,000 in-hospital).<sup>1</sup> In the majority of arrests, the initial rhythm is not  
78 ventricular fibrillation (VF) or ventricular tachycardia (VT), but is pulseless electrical activity  
79 (PEA) or asystole.<sup>2-5</sup> The incidence of VT/VF has decreased over the last several decades,<sup>6-10</sup>  
80 while the incidence of PEA/asystole has increased.<sup>1, 8-11</sup>

81 Data from the National Registry of CPR, reporting on 51,919 in-hospital arrests, found  
82 only 24% had an initial rhythm of VT/VF.<sup>5</sup> The initial rhythm was PEA in 37% and asystole in  
83 39%. Since most patients were monitored and response times were short, the high incidence of  
84 PEA/asystole cannot be ascribed to patients being late in cardiac arrest. Similar trends have been  
85 seen for out-of-hospital arrests. Data from the Resuscitation Outcomes Consortium, reporting on  
86 12,930 out-of-hospital arrests, found that only 26% had an initial rhythm of VT/VF.<sup>6</sup> Data from  
87 the CARES registry documented similar findings in 25,116 out-of-hospital arrests.<sup>12</sup> Thus, the  
88 majority of cardiac arrests today are due to PEA/asystole. The reasons why there are more  
89 PEA/asystolic arrests remain unknown.

90 The survival rate for VT/VF arrest averages 20%.<sup>1</sup> The survival rate for PEA/asystolic  
91 arrest is substantially lower, averaging 5%.<sup>1, 5</sup> There is a critical need for improved resuscitation  
92 strategies, since each 1% increase in survival rate would result in approximately 5000 additional  
93 survivors. This critical need is most apparent in PEA arrest, as little is known about its  
94 pathophysiology or its optimal treatment, especially when compared to VT/VF arrest.

95 Understanding PEA has been limited by the lack of a clinically relevant laboratory model.

96 A substantial number of PEA patients have chronic coronary disease, suggesting that  
97 coronary ischemia may be a significant contributing factor.<sup>13</sup> One study of cardiac arrest found  
98 that one-third of patients with resuscitated PEA underwent intervention for acute coronary

99 occlusion.<sup>14</sup> A major question that remains is why ischemia induces VT/VF arrest in some cases,  
100 while inducing PEA arrest in others. In a small percentage of patients, PEA is due to a  
101 recognizable and potentially reversible factor (i.e. pulmonary embolus), but specific treatments  
102 for these factors have had little effect on survival.<sup>8, 15</sup> In the vast majority of patients with PEA  
103 arrest, the mechanism of the arrest is not well understood.

104         The effect of ischemic preconditioning (IPC) in the context of ischemia/reperfusion  
105 injury has been well studied.<sup>16-21</sup> IPC entails exposing myocardial tissue to several short  
106 ischemic episodes, followed by recovery, prior to prolonged ischemia. IPC in animal studies  
107 significantly mitigates the toxicity of ischemia/reperfusion.<sup>17,20,22,23</sup> One of these toxic effects is  
108 VT/VF, and remarkably, animals preconditioned with short bouts of ischemia prior to prolonged  
109 ischemia/reperfusion suffer less VT/VF than non-preconditioned animals.<sup>24-26</sup>

110         We hypothesized that chronic ischemia induces myocardial conditioning, which prevents  
111 or delays the occurrence of VF. We aimed to test whether IPC shifts the effect of a large  
112 ischemic burden to cause less VF. We also hypothesized that a large proportion of PEA arrests  
113 are due to ventricular muscle failure from acute ischemia in a substrate with chronic left  
114 ventricular (LV) dysfunction. We aimed to test whether PEA can result from profound ischemia  
115 in the setting of chronic LV dysfunction. We further hypothesized that chronic ischemia in the  
116 setting of chronic LV dysfunction shifts the effect of a large ischemic burden from VF to  
117 sustained PEA arrest. We aimed to test whether IPC in the setting of chronic LV dysfunction can  
118 convert an otherwise ischemia-induced VF arrest into an ischemia-induced PEA arrest.

119

120

121 **Methods**

122 Study Design:

123 This was a controlled laboratory experiment performed using swine. All animals were treated in  
124 accordance with institutional Johns Hopkins Animal Care and Use Committee (Protocol  
125 Number: SW16M78) guidelines and in strict compliance with the Animal Welfare Act  
126 regulations and Public Health Service Policy. Aortic pressure and electrocardiographic (ECG)  
127 monitoring was continuous for all protocols. All hemodynamic tracings included show blood  
128 pressure (y-axis) versus time (x-axis). Some included tracings also include a continuous ECG  
129 rhythm (y-axis) versus time (x-axis). PEA was defined as mean arterial blood pressure (MAP)  
130 below 40 mmHg, if organized ECG complexes were present. Study endpoints included incidence  
131 of VF, incidence of PEA, time to VF, and time to PEA.

132 *Animal preparation:* Pigs ( $35 \pm 5$  kg, female, American Yorkshire breed) were tranquilized with  
133 sedazine 18  $\mu$ g/Kg, ketamine 0.9 mg/Kg *IM*, and telazol 0.23 mg/Kg *IM*, anesthetized with  
134 pentothal 15 mg/Kg *IV*, intubated and mechanically ventilated (Narkomed 2A, Drager) with  
135 100% O<sub>2</sub> and 0.5 - 1.5% isoflurane. Percutaneous femoral venous and arterial access was  
136 established. An arterial sheath was placed in the femoral artery for systemic blood pressure  
137 measurements. Coronary guide catheters (6 Fr) were placed in desired coronary arteries.  
138 Angioplasty catheters (3x8mm) were positioned under fluoroscopy in desired coronary arteries.  
139 In some animals, we assayed for coronary reactive hyperemia via Doppler coronary flow wire  
140 (Volcano Therapeutics, 0.014" diameter). Transthoracic echocardiograms were performed to  
141 assess wall motion, ejection fraction (EF), and stroke volume. All collected hemodynamic and  
142 arrhythmia data is shown in Fig 1. Advanced cardiac life support (ACLS) was performed at onset  
143 of VF for all animals.

144 **Fig 1: Animal Data:** Baseline hemodynamics (in multiple procedures groups, the baseline data  
145 listed are prior to the final experiment), Time to PEA, Time to VF, and Duration of PEA (when  
146 applicable). Abbreviations: SBP (systolic blood pressure), DBP (diastolic blood pressure), MAP  
147 (mean arterial pressure), HR (heart rate)

148

149 *Animal Groups/Protocols (Fig 2):*

150

151 **Fig 2: Animal Group Protocols;** abbreviations: LAD: left anterior descending, RCA: right  
152 coronary artery, LCX: left circumflex artery, ACLS: advanced cardiac life support, RH: reactive  
153 hyperemia, VF: ventricular fibrillation, PEA: pulseless electrical activity

154

155 Acute Ischemia:

- 156 1. No Preconditioning (n=8): After the initial preparation, a single mid-left anterior  
157 descending (LAD) occlusion was performed for 60 minutes or until VF onset.
- 158 2. Single Vessel Ischemic Preconditioning (n=8): After the initial preparation, four cycles  
159 of 3 minutes of occlusion/7 minutes of reperfusion were performed in the LAD territory.  
160 After this series, a final mid-LAD occlusion was performed for 60 minutes or until VF  
161 onset.

162 Left Ventricular Dysfunction prior to Acute Ischemia:

- 163 3. Acute Ischemia in the setting of Significant LV Dysfunction (n=8): Two-hour infarcts  
164 were created in both the proximal right coronary artery (RCA) territory and proximal left  
165 circumflex (LCX) territory, in that order, by occluding each respective artery for two

166 hours. Infarcts were separated by one week. One week after the LCX infarct, the  
167 proximal LAD was occluded for 60 minutes or until VF onset.

168 4. Proximal Ischemic Preconditioning in the setting of Significant LV Dysfunction (n=4):

169 Two-hour infarcts were created in both the proximal RCA territory and proximal LCX  
170 territory, in that order. Infarcts were separated by one week. One week after the LCX  
171 infarct, four cycles of 2 minute occlusion (duration limited by hypotension)/7 minutes of  
172 reperfusion were performed in the proximal LAD territory. After this series, a final  
173 proximal LAD occlusion was performed for 60 minutes or until VF onset.

174 5. Distal Ischemic Preconditioning in the setting of Significant LV Dysfunction (n=6):

175 Two-hour infarcts were created choosing either the proximal RCA or mid LAD first,  
176 followed by a second infarct in an alternate territory (either proximal LCX or proximal  
177 RCA, respectively). Infarcts were separated by one week. One week after the second  
178 infarct, four cycles of 3 minutes of occlusion/7 minutes of reperfusion were performed in  
179 the distal part of the vessel to the un-infarcted territory. After this series, a final occlusion  
180 was performed in the proximal part of the same vessel for 60 minutes or until VF onset.

181

182 *Development of the PEA Model:* Before choosing the protocol described in animal group 3, we  
183 attempted various sequences of both ischemia and infarct to assess their tendency to lead to VF  
184 versus severe hypotension/PEA. This included looking at hemodynamic responses to proximal  
185 LAD ischemia only, mid-LAD infarct followed by proximal RCA ischemia only, and proximal  
186 RCA infarct followed by proximal LCX ischemia only.

187

188 *Statistical Analysis:* Assuming that few, if any, preconditioned animals develop VF, at least four  
189 animals/group are needed to show a statistically significant difference compared to control. All



190 mean values are accompanied by standard deviations. All statistical analyses were two-sided and  
191 done with  $\alpha = 0.05$ . Comparisons of means between two groups were performed using  
192 unpaired t-test. Survival comparisons between groups were performed using the log-rank test.

193

## 194 **Results**

### 195 **Acute ischemia in the setting of ischemic preconditioning delays or prevents ventricular** 196 **fibrillation**

#### 197 *Animal Group 1: No Preconditioning (n=8)*

198 In this group, 7/8 animals suffered VF cardiac arrest with mean time to VF of  $20.7 \pm 4.9$   
199 min after onset of mid-LAD occlusion. There was no significant hypotension prior to VF in any  
200 animals (Fig 3A, 3B).

201

202 **Figure 3: Animals with Acute Ischemia; A)** Animal Group 1, hemodynamic tracing during  
203 mid-LAD occlusion, **B)** Animal Group 1, onset of VF, **C)** Animal Group 2, hemodynamic  
204 tracing showing IPC protocol and prolonged final occlusion without VF, **D)** Freedom from VF  
205 during ischemia: IPC delays/prevents VF ( $p < 0.002$ , log-rank test)

206

#### 207 *Animal Group 2: Single Vessel Ischemic Preconditioning (n=8)*

208 In this group, we tested whether IPC leads to less ischemia-induced VF and thus changes  
209 the arrhythmic burden of acute ischemia of a large territory of the heart.

210 With the IPC protocol, 6/8 animals had no VF during 60 minutes of ischemia. The  
211 remaining 2/8 animals had significantly delayed time to VF compared to the 7 animals in group 1

212 that had VF ( $37.1 \pm 7.3$  min vs.  $20.7 \pm 4.9$  min,  $p < 0.001$ , t-test). As with group 1 animals, there  
213 was no significant hypotension in group 2 animals prior to VF (Fig 3C). Fig 3D compares  
214 freedom from VF during ischemia between groups 1 and 2. IPC significantly delayed/prevented  
215 VF compared to non-preconditioned animals ( $p < 0.002$ , log-rank test).

216 Although VT/VF suppression is a known effect of IPC (in other species), and could be a  
217 marker for successful myocardial preconditioning, we performed an additional assay to confirm  
218 successful preconditioning. In prior animal studies (goats and rats), IPC alters the coronary  
219 reactive hyperemia response after coronary occlusion.<sup>27-28</sup> Coronary reactive hyperemia is the  
220 transient increase in coronary blood flow upon reperfusion after occlusion of a coronary artery.  
221 IPC causes a decrease in time to peak coronary flow upon reperfusion and a decrease in total  
222 hyperemic flow.<sup>27</sup>

223 We used a coronary Doppler flow wire to quantify coronary reactive hyperemia at  
224 baseline and after IPC in 10 animals that underwent IPC protocols. A representative coronary  
225 flow tracing from one of these animals is shown (Fig 4A). Using area under the curve (AUC) as  
226 a surrogate for total hyperemic flow, IPC caused a mean percent decrease of  $50\% \pm 16\%$  in  
227 AUC. IPC also caused a mean percent decrease in time to peak coronary flow velocity of  $46\% \pm$   
228  $14\%$  (Fig 4B). The magnitude of these changes is comparable to the reactive hyperemia response  
229 seen in other IPC studies.<sup>27-28</sup>

230

231 **Fig 4: Coronary Reactive Hyperemia; A)** Coronary flow vs. time during reactive hyperemia at  
232 baseline and after IPC. The first vertical line is vessel occlusion and the second is vessel  
233 reperfusion. **B)** Time to peak coronary flow velocity during reactive hyperemia at baseline  
234 ( $52 \pm 15$  sec) and after IPC ( $27 \pm 8$  sec), ( $p < 0.001$ , t-test)

235 **Developing a model of ischemic PEA arrest**

236

237 To develop an ischemic model of PEA, we realized that we needed acute ischemia to  
238 cause significant hypotension. We postulated that substantial LV dysfunction is necessary prior  
239 to acute ischemia for PEA to develop. To this end, we tested multiple protocols of regional  
240 coronary ischemia/infarction to assess each protocol's hemodynamic response to acute ischemia.

241 Proximal LAD Infarct: We first assessed the hemodynamic response to proximal LAD  
242 infarct. Although a prolonged proximal LAD occlusion was tolerated, upon reperfusion, animals  
243 would invariably suffer VF arrest and resuscitation was rarely successful. Representative  
244 hemodynamic tracings are shown (Fig 5A and 5B).

245

246 **Fig 5: Development of the PEA Model; A)** Hemodynamic tracing during proximal LAD  
247 ischemia, **B)** Hemodynamic tracing showing reperfusion after 2 hours of proximal LAD  
248 occlusion. Reperfusion complicated by refractory VF, unable to resuscitate despite 20-25  
249 minutes of ACLS. **C)** Hemodynamic tracing of acute proximal RCA ischemia with prior mid  
250 LAD infarction, **D)** Hemodynamic tracing of acute proximal LCX ischemia with prior proximal  
251 RCA infarction

252

253 Proximal Ischemia with Single Prior Infarct: We then looked at the hemodynamic  
254 response to acute proximal right coronary artery (RCA) ischemia in the setting of prior mid LAD  
255 infarction. These animals tolerated acute RCA ischemia without significant prolonged  
256 hypotension/PEA (Fig 5C). Similarly, we looked at the hemodynamic response to acute proximal

257 left circumflex (LCX) artery ischemia in the setting of prior proximal RCA infarction; again,  
258 animals tolerated this protocol without significant prolonged hypotension/PEA (Fig 5D).

259 Proximal Ischemia with Multiple Prior Infarcts: We then attempted protocols with  
260 multiple prior infarcts. Ultimately, the protocol described below for group 3 animals reliably  
261 reproduced hypotension/PEA. This protocol was also the safest for animals to tolerate the  
262 multiple infarctions and survive until the final experiment.

263

264 **Acute ischemia in the setting of LV dysfunction produces PEA arrest**

265 *Animal Group 3: Acute Ischemia in the setting of Significant LV Dysfunction (n=8)*

266 In this group, we studied the hemodynamic response to acute ischemia in the setting of  
267 prior significant LV dysfunction. Significant LV dysfunction was produced by creating infarcts  
268 in both the proximal RCA and proximal LCX territories; infarcts were separated by one week.  
269 One week after the LCX infarct, we occluded the proximal LAD. Representative hemodynamic  
270 tracings are shown, which include the onset of severe hypotension upon proximal LAD ischemia  
271 (Fig 6A), as well as a higher sweep speed showing severe hypotension with organized electrical  
272 activity, i.e. PEA (Fig 6B). All 8 animals in this group suffered PEA shortly after LAD occlusion  
273 and remained in PEA until subsequent VF. The mean time to VF was  $13.1 \pm 5.6$  min.

274

275 **Fig 6: Animals with Left Ventricular Dysfunction prior to Acute Ischemia; A)** Group 3,  
276 hemodynamic response to proximal LAD ischemia in animals with prior LV dysfunction, **B)**  
277 Group 3, hemodynamic tracing during successful PEA (severe hypotension with organized ECG  
278 complexes), **C)** Group 4, hemodynamic tracing showing IPC (only 2 min occlusions) prior to  
279 final proximal LAD occlusion in animals with prior LV dysfunction; note PEA followed by early

280 VF. **D)** Group 5, hemodynamic tracing showing distal LCX IPC (3 min occlusions) followed by  
281 reperfusion, **E)** Group 5, acute proximal LCX ischemia in the setting of prior LV dysfunction  
282 and distal LCX IPC, **F)** Group 5, *sustained PEA* with severe hypotension and organized ECG (no  
283 subsequent VF).

284

285 **Acute ischemia in the setting of LV Dysfunction and Ischemic Preconditioning produces**  
286 **sustained PEA arrest**

287 *Animal Group 4: Proximal Ischemic Preconditioning in the setting of Significant LV Dysfunction*  
288 *(n=4)*

289 Significant LV dysfunction was again created (via proximal RCA and proximal LCX  
290 infarctions). Then, we tested whether LAD ischemic preconditioning (remaining viable  
291 myocardial territory) prior to acute ischemia can delay or prevent the onset of VF (as in animal  
292 group 2). Due to severe hypotension, our proximal LAD IPC occlusions were limited to 2  
293 minutes (instead of 3 minutes as in Group 2 animals). IPC was followed by acute proximal LAD  
294 occlusion. We again produced PEA in all animals, and all subsequently had VF arrest at a mean  
295 time to VF of  $10.6 \pm 2.1$  min. The mean time to VF was not significantly different from Group 3  
296 ( $p=0.42$ , t-test). A representative hemodynamic tracing is shown (Fig 6C).

297 We suspected that IPC in animal group 4 was unsuccessful in delaying VF due to  
298 inadequate preconditioning. IPC was inadequate because the duration of the IPC occlusions in  
299 these animals was limited. In these animals, we did not achieve full 3 min IPC occlusions due to  
300 severe hypotension during each proximal LAD IPC occlusion.

301 Furthermore, we wondered whether an alternate sequence of infarctions and final  
302 ischemia would alter the propensity for development of PEA. We suspected that the specific

303 territory impacted by the final occlusion was less important than the overall amount of LV  
304 dysfunction prior to the final experiment.

305

306 *Animal Group 5: Distal Ischemic Preconditioning in the setting of Significant LV Dysfunction*  
307 *(n=6)*

308 We tested the possibility that short duration IPC (<3 min occlusions) was not successful  
309 in delaying VF by adjusting our protocol. We also tested whether the specific final ischemic  
310 territory was an important factor in whether or not animals developed PEA during acute ischemia  
311 in the context of LV dysfunction. We chose either a mid-LAD infarct or proximal RCA infarct to  
312 perform as the first infarct. That was followed one week later by either a proximal RCA infarct  
313 (if the first infarct was mid-LAD) or a proximal LCX infarct (if the first infarct was proximal  
314 RCA). On the final experiment, however, we performed IPC of the distal remaining territory  
315 (either LCX or LAD) to allow four full cycles of 3 min IPC occlusion/7 min reperfusion; MAP  
316 was maintained  $\geq 45$  mmHg during IPC occlusions (Fig 6D). Then, a proximal occlusion was  
317 performed in the same un-infarcted territory (for 60 minutes or until VF onset). Representative  
318 hemodynamic tracings are shown, which include the onset and duration of PEA upon proximal  
319 ischemia (Fig 6E), as well as a higher sweep speed showing organized electrical activity during  
320 prolonged PEA (Fig 6F).

321 In this group, all 6 animals suffered early PEA after final occlusion. In 2/6 animals, there  
322 was sustained PEA without subsequent VF for the entire 60 minute occlusion. This compares  
323 with 0/12 non-preconditioned animals (groups 3 and 4) that were free from VF during the 60  
324 minute occlusion. In the remaining 4/6 animals in group 5, PEA was prolonged prior to  
325 subsequent VF; mean time to VF was significantly delayed compared to non-preconditioned

326 animals ( $33.7 \pm 7.8$  min vs.  $12.2 \pm 5.0$  min,  $p < 0.0001$ , t-test). This protocol successfully  
327 produced *sustained* PEA arrest. Distal territory IPC in the setting of significant LV dysfunction  
328 significantly delayed or prevented VF during acute ischemia ( $p < 0.001$ , log-rank test, Fig 7A).

329

330 **Fig 7: Prolonged PEA; A)** Freedom from VF during ischemia (in the setting of prior LV  
331 dysfunction) comparing animal groups 3-5: IPC (3 min occlusions in a distal territory)  
332 successfully delayed/prevented VF and led to *sustained* PEA after final ischemia in the setting of  
333 prior LV dysfunction ( $p < 0.001$ , log-rank test) **B)** Severe cardiac dysfunction is necessary for  
334 PEA (n = 12)

335

336 LV dysfunction (via transthoracic echocardiography) was quantified in most animals with  
337 PEA arrest (n=12). A normal LV EF at baseline in swine is similar to that in humans,  
338 approximately 50-65% (Supplemental Movies S1-2). The amount of cardiac dysfunction  
339 necessary for PEA was substantial (Fig 7B). Mean EF prior to the final experiment was  $15\% \pm$   
340  $5\%$ , consistent with our aim of producing significant LV dysfunction prior to the final ischemic  
341 insult (Supplemental Movies S3-4). The mean EF necessary for PEA onset was  $5\% \pm 3\%$   
342 (Supplemental Movies S5-6). Furthermore, the cardiac output (CO) necessary for PEA onset was  
343  $1.6 \pm 0.4$  L/min, approximately a 70% reduction from baseline (CO of  $5.0 \pm 0.8$  L/min).

344

345

346

347

348 **Discussion**

349           There are three major new findings in this study: 1) ischemic preconditioning delays or  
350 prevents the onset of VT/VF in a swine model of acute coronary ischemia, 2) acute ischemia in  
351 the setting of substantial, chronic LV dysfunction reliably produces PEA cardiac arrest, and 3)  
352 ischemic preconditioning in the setting of substantial, chronic LV dysfunction reliably produces  
353 *sustained* PEA arrest upon acute ischemia.

354           We demonstrated that IPC delays/prevents the onset of VT/VF in a swine model of acute  
355 coronary ischemia (Fig 3D).

356           Our goal however, was to model clinical PEA. Traditionally, PEA is classified as  
357 normotensive PEA, pseudo-PEA, and true PEA.<sup>45</sup> Normal myocardial contractions in the  
358 absence of detectable pulses is “normotensive” PEA. This occurs secondary to a reversible  
359 condition, i.e. tension pneumothorax, tamponade, or hypovolemia. Normotensive PEA does not  
360 represent a significant subset of patients with clinical PEA. Pseudo-PEA is characterized by  
361 weak myocardial contractions that produce detectable aortic pressure only measurable by  
362 invasive monitoring or echocardiography.<sup>29-31</sup> True PEA is the absence of myocardial  
363 contractions, typically the final stage of PEA occurring after prolonged exposure to acidosis and  
364 hypoxia.<sup>29-31</sup>

365           Pseudo-PEA represents a substantial portion of PEA arrest<sup>31</sup> and population data suggest  
366 coronary ischemia is a major contributor to PEA.<sup>12</sup> Thus, we attempted to create an ischemic  
367 model of PEA. If ischemia is to cause PEA, it needs to produce weak myocardial contractions  
368 unable to achieve an adequate perfusion pressure despite organized cardiac electrical activity.

369           With mid-LAD ischemia (animal groups 1-2), significant hypotension was not observed  
370 prior to VF (despite delaying/preventing VF in group 2). We proposed that significant LV



371 dysfunction prior to acute ischemia may produce the desired hypotension and thus, PEA. This  
372 approach to modeling PEA is clinically relevant (patients with PEA often have underlying  
373 cardiomyopathy and LV dysfunction).

374

### 375 *Development of the PEA Model*

376 To create LV dysfunction, we tested various ischemia/infarction sequences to quantify  
377 the dysfunction required to induce the necessary hypotension. We attempted single vessel  
378 proximal ischemia (LAD) as well as single infarcts followed by alternate vessel ischemia.  
379 Neither of these protocols produced enough hypotension.

380 A two-infarct protocol prior to prolonged ischemia in the third coronary territory finally  
381 reliably induced severe hypotension/PEA. This is the second major finding in this study:  
382 prolonged ischemia in the setting of significant LV dysfunction reliably produces PEA. This is  
383 the first animal model of ischemic PEA cardiac arrest. PEA was reliably induced, however it was  
384 soon followed by subsequent VF (animal group 3).

385 In human adult PEA arrest, PEA is often prolonged (> 20 minutes) prior to  
386 discontinuation of resuscitation efforts if there is no return of spontaneous circulation. Next, we  
387 aimed to model the *prolonged* PEA that is a common clinical scenario. Perhaps prior LV  
388 dysfunction and ischemic preconditioning prior to prolonged ischemia could delay/prevent  
389 VT/VF and lead to sustained PEA?

390 Animal groups 4 and 5 investigated this hypothesis and successfully showed that LV  
391 dysfunction and ischemic preconditioning prior to acute ischemia reliably produced *sustained*  
392 PEA. Our results show that a critical duration of ischemia is necessary for successful IPC (to  
393 exert an anti-arrhythmic effect upon prolonged ischemia). Furthermore, we were successful in

394 delaying VF (animal group 5) despite only exposing a distal coronary territory to IPC. IPC was  
395 successful via “remote” preconditioning. That is, the entire territory (and likely the entire  
396 myocardium) was conditioned despite a distal site of IPC. In animals with prior mid-LAD and  
397 proximal RCA infarcts, where only the distal LCX territory underwent IPC, it follows that all of  
398 the remaining un-infarcted territory (supplied by the LCX and proximal LAD) was  
399 preconditioned given that we achieved sustained PEA without early VF upon acute ischemia.  
400 Remote IPC conferring global myocardial protection from ischemia has been reported.<sup>26, 32-34</sup>

401         Given the success of remote IPC, we attempted a hyper-acute (single experiment) model  
402 of sustained PEA: a proximal RCA infarct was created, then immediate distal LAD IPC, and  
403 finally proximal LAD occlusion. Early VF occurred without PEA; non-sustained ventricular  
404 ectopy was noted throughout after the RCA infarct. We suspect the underlying pathobiology of  
405 acute infarct (followed by reperfusion) led to increased arrhythmogenicity and predisposition to  
406 VF. This confirmed our hypothesis that *chronic*, not acute, LV dysfunction is necessary for  
407 ischemic PEA.

408         Severe cardiac dysfunction is necessary for PEA (mean EF ~15% prior to final prolonged  
409 ischemia, mean EF ~5% at PEA onset). PEA onset required approximately a 70% reduction in  
410 cardiac output from baseline. We suspected that LV dysfunction was necessary to induce PEA;  
411 however, this severity of dysfunction was beyond our expectations.

412

### 413 *The Role of Ischemic Preconditioning in Human PEA/Clinical Implications*

414         Our work offers important and novel insights into the pathophysiology and development  
415 of human PEA cardiac arrest.

416 Many PEA arrest patients have chronic coronary disease<sup>12-14</sup>, and we suspect these  
417 patients experience numerous ischemic episodes over their lifetime via unstable coronary  
418 syndromes, stable angina, and asymptomatic small vessel ischemia. Chronic ischemia may  
419 induce myocardial conditioning similar to the effect of IPC in our model. IPC has a substantial  
420 anti-arrhythmic effect, and chronic ischemic events (in addition to the antiarrhythmic effects of  
421 cardiovascular medications including beta-blockers<sup>35</sup>) may prevent ischemic VF arrest and result  
422 in both symptomatic infarcts and so-called “silent” infarcts. Infarcts contribute to progressive LV  
423 dysfunction, which likely predisposes patients to PEA arrest with their next ischemic insult.

424 Even distal territory ischemia promoted global myocardial preconditioning and exerted  
425 an impressive anti-arrhythmic effect in our model. Many patients with coronary disease suffer  
426 from chronic small vessel ischemia that is asymptomatic and undiscovered. When discovered,  
427 revascularization is often contraindicated due to vessel size. This provides the perfect substrate  
428 for global ischemic preconditioning and promotes LV dysfunction.

429 This is the third major new finding of this study: chronic ischemia and chronic LV  
430 dysfunction provide the critical substrate and mechanism by which acute ischemia can convert  
431 an otherwise ischemia-induced VF arrest into an ischemia-induced PEA arrest (Fig 8).

432

433 **Fig 8: Ischemic Preconditioning and Left Ventricular Dysfunction: a novel mechanism for**  
434 **ischemic pulseless electrical activity.** Coronary artery disease and chronic ischemia (via stable  
435 angina, unstable angina, and asymptomatic small vessel ischemia) cause ischemic  
436 preconditioning, which increases the likelihood of arrhythmia-free survival from infarction.  
437 Infarction leads to progressive left ventricular dysfunction and with ongoing ischemic

438 preconditioning, provides the necessary substrate for the development of pulseless electrical  
439 activity with the next profound ischemic insult.

440

441 It should be no surprise then, that as incident heart failure continues to rise and more  
442 people with chronic coronary disease are living longer with more severe ischemic disease (due to  
443 improved therapies),<sup>36</sup> that the proportion of PEA cardiac arrest has also risen concomitantly  
444 over the last half century.<sup>4-13</sup>

445

#### 446 **Conclusions and Future Directions**

447 Ischemic preconditioning can delay or prevent the onset of ventricular tachyarrhythmias  
448 in a swine model of acute coronary ischemia. A profound, acute, ischemic insult on a  
449 background of chronic LV dysfunction reliably produces PEA arrest. This is the first animal  
450 model of ischemic PEA arrest. Furthermore, ischemic preconditioning prior to acute ischemia in  
451 the context of chronic LV dysfunction reliably produces *sustained* PEA arrest, similar to human  
452 PEA arrest. This is a novel pathophysiologic mechanism for ischemia-related PEA arrest.

453 Substantial cardiac dysfunction is necessary for ischemic PEA. Despite the severity of  
454 LV dysfunction, animals were doing well (by veterinary metrics, including responsiveness,  
455 activity level, and oral intake) prior to the acute ischemic insult that induced PEA. This suggests  
456 that PEA may also be reversible acutely. However, given the profound cardiac dysfunction  
457 necessary for PEA, reversal of PEA likely requires a resuscitation algorithm that is just as  
458 profound and/or aggressive. The currently practiced resuscitation algorithm is likely inadequate  
459 to successfully treat PEA cardiac arrest, leading to today's abysmal survival rates.

460 We aim to use this ischemic PEA model to study the effects of novel and aggressive  
461 techniques in the optimization of systemic/cerebral blood flow during cardiopulmonary  
462 resuscitation, because improved blood flow leads to enhanced survival during cardiac  
463 arrest.<sup>37-42</sup>

464

465 **Limitations:**

466 The main limitation of applying our study to human health is that swine are more prone  
467 to ventricular arrhythmias in response to coronary ischemia than humans.<sup>43</sup> Thus, the  
468 reproducibility of VF shown in our non-preconditioned animals may not be directly  
469 generalizable to human coronary ischemia/VF. However, demonstrating that we can delay or  
470 prevent VF in swine despite their susceptibility to arrhythmia is a significant finding.

471

472 **Acknowledgements:** We thank the Johns Hopkins Animal Care and Use Committee for their  
473 support with animal husbandry.

474

475

476 **References:**

477

- 478 1. Go AS, Mozaffarian D, Roger VL, Benjamin EJ, Berry JD, Borden WB, et al. Heart  
479 disease and stroke statistics--2013 update: A report from the American Heart Association.  
480 *Circulation*. 2013; 127: e160-e161.
- 481 2. Raizes G, Wagner GS, Hackel DB. Instantaneous nonarrhythmic cardiac death in acute  
482 myocardial infarction. *Am J Cardiol*. 1977;39: 1-6.
- 483 3. Wenzel V, Krismer AC, Arntz HR, Sitter H, Stadlbauer KH, Lindner KH. A comparison  
484 of vasopressin and epinephrine for out-of-hospital cardiopulmonary resuscitation. *N Engl*  
485 *J Med*. 2004; 350: 105-113.
- 486 4. Peberdy MA, Kaye W, Ornato JP, Larkin GL, Nadkarni V, Mancini ME, et al.  
487 Cardiopulmonary resuscitation of adults in the hospital: A report of 14720 cardiac arrests  
488 from the national registry of cardiopulmonary resuscitation. *Resuscitation*. 2003;58:297-  
489 308.

- 490 5. Meaney PA, Nadkarni VM, Kern KB, Indik JH, Halperin HR, Berg RA. Rhythms and  
491 outcomes of adult in-hospital cardiac arrest. *Crit Care Med.* 2010; 38: 101-108.
- 492 6. Weisfeldt ML, Everson-Stewart S, Sitlani C, Rea T, Aufderheide TP, Atkins DL, et al.  
493 Ventricular tachyarrhythmias after cardiac arrest in public versus at home. *N Engl J Med.*  
494 2011; 364: 313-321.
- 495 7. Cobb LA, Fahrenbruch CE, Olsufka M, Copass MK. Changing incidence of out-of-  
496 hospital ventricular fibrillation, 1980-2000. *JAMA.* 2002; 288: 3008-3013.
- 497 8. Abu-Laban RB, Christenson JM, Innes GD, van Beek CA, Wanger KP, McKnight RD, et  
498 al. Tissue plasminogen activator in cardiac arrest with pulseless electrical activity. *N Engl*  
499 *J Med.* 2002; 346: 1522-1528.
- 500 9. Parish DC, Dinesh Chandra KM, Dane FC. Success changes the problem: Why  
501 ventricular fibrillation is declining, why pulseless electrical activity is emerging, and  
502 what to do about it. *Resuscitation.* 2003; 58: 31-35.
- 503 10. Wang H, Tang W, Ristagno G, Li Y, Sun S, Wang T, et al. The potential mechanisms of  
504 reduced incidence of ventricular fibrillation as the presenting rhythm in sudden cardiac  
505 arrest. *Crit Care Med.* 2009; 37: 26-31.
- 506 11. Myerburg RJ, Halperin H, Egan DA, Boineau R, Chugh SS, Gillis AM, et al. Pulseless  
507 electric activity: Definition, causes, mechanisms, management, and research priorities for  
508 the next decade: Report from a national heart, lung, and blood institute workshop.  
509 *Circulation.* 2013; 128: 2532-2541.
- 510 12. Mader TJ, Nathanson BH, Millay S, Coute RA, Clapp M, McNally B; CARES  
511 Surveillance Group. Out-of-hospital cardiac arrest outcomes stratified by rhythm  
512 analysis. *Resuscitation.* 2012;83:1358–1362.
- 513 13. Teodorescu C, Reinier K, Dervan C, Uy-Evanado A, Samara M, Mariani R, et al. Factors  
514 associated with pulseless electric activity versus ventricular fibrillation: The Oregon  
515 sudden unexpected death study. *Circulation.* 2010; 122: 2116-2122.
- 516 14. Dumas F, Cariou A, Manzo-Silberman S, Grimaldi D, Vivien B, Rosencher J, et al.  
517 Immediate percutaneous coronary intervention is associated with better survival after out-  
518 of-hospital cardiac arrest: insights from the PROCAT (Parisian Region Out of hospital  
519 Cardiac Arrest) registry. *Circ Cardiovasc Interv.* 2010; 3: 200–207.
- 520 15. Saarinen S, Nurmi J, Toivio T, Fredman D, Virkkunen I, Castren M. Does appropriate  
521 treatment of the primary underlying cause of peaa during resuscitation improve patients'  
522 survival? *Resuscitation.* 2012;83: 819-822.
- 523 16. Di Lisa F, Bernardi P. Mitochondria and ischemia-reperfusion injury of the heart: Fixing  
524 a hole. *Cardiovascular research.* 2006;70: 191-199.
- 525 17. Sanada S, Komuro I, Kitakaze M. Pathophysiology of myocardial reperfusion injury:  
526 Preconditioning, postconditioning, and translational aspects of protective measures.  
527 *American Journal of Physiology. Heart and circulatory physiology.* 2011; 301: H1723-  
528 1741.
- 529 18. Halestrap AP. Calcium, mitochondria and reperfusion injury: A pore way to die.  
530 *Biochemical Society transactions.* 2006; 34: 232-237.

- 531 19. Halestrap AP, Kerr PM, Javadov S, Woodfield KY. Elucidating the molecular  
532 mechanism of the permeability transition pore and its role in reperfusion injury of the  
533 heart. *Biochimica et biophysica acta*. 1998; 1366: 79-94.
- 534 20. Sato T, Sasaki N, Seharaseyon J, O'Rourke B, Marban E. Selective pharmacological  
535 agents implicate mitochondrial but not sarcolemmal k(atp) channels in ischemic  
536 cardioprotection. *Circulation*. 2000; 101: 2418-2423.
- 537 21. Sato T, Sasaki N, O'Rourke B, Marban E. Nicorandil, a potent cardioprotective agent,  
538 acts by opening mitochondrial atp-dependent potassium channels. *J Am Coll Cardiol*.  
539 2000; 35: 514-518.
- 540 22. Vegh A, Parratt JR. The role of mitochondrial k(atp) channels in antiarrhythmic effects of  
541 ischaemic preconditioning in dogs. *British journal of pharmacology*. 2002; 137: 1107-  
542 1115.
- 543 23. Murry CE, Jennings RB, Reimer KA. Preconditioning with ischemia: a delay of lethal  
544 cell injury in ischemic myocardium. *Circulation*. 74(5), 1124-36 (2002).
- 545 24. Crisostomo PR, Wairiuko GM, Wang M, Tsai BM, Morrell ED, Meldrum DR.  
546 Preconditioning versus postconditioning: Mechanisms and therapeutic potentials. *J Am*  
547 *Coll Surg*. 2006; 202: 797-812.
- 548 25. Wu ZK, Iivainen T, Pehkonen E, Laurikka J, Tarkka MR. Ischemic preconditioning  
549 suppresses ventricular tachyarrhythmias after myocardial revascularization. *Circulation*.  
550 2002; 106(24) : 3091-6.
- 551 26. Przyklenk K, Bauer B, Ovize M, Kloner R, Whittaker P. Regional ischemic  
552 "preconditioning" protects remote virgin myocardium from subsequent sustained  
553 coronary occlusion. *Circulation*. 1993; 87: 893-899.
- 554 27. Gattullo D, Linden RJ, Losano G, Pagliaro P, Westerhof N. Ischaemic preconditioning  
555 changes the pattern of coronary reactive hyperaemia in the goat: role of adenosine and  
556 nitric oxide. *Cardiovasc Res*. 1999; 42(1): 57-64.
- 557 28. Rochetaing, A, Kreher P. Reactive hyperemia during early reperfusion as a determinant  
558 of improved functional recovery in ischemic preconditioned rat hearts. *J Thorac*  
559 *Cardiovasc Surg*. 2003; 125: 1516-25.
- 560 29. Paradis NA, Martin GB, Goetting MG, Rivers EP, Feingold M, Nowak  
561 RM. Aortic pressure during human cardiac arrest. Identification of pseudo-  
562 electromechanical dissociation. *Chest*. 1992; 101: 123-128.
- 563 30. Patil KD, Halperin HR, Becker LB. Cardiac Arrest: Resuscitation and Reperfusion.  
564 *Circulation Research*. 2015; 116: 2041-2049.
- 565 31. Aufderheide, TP. "Etiology, electrophysiology, and myocardial mechanics of pulseless  
566 electrical activity." *Cardiac Arrest: The Science and Practice of Resuscitation Medicine*.  
567 Ed. NA Paradis, HR Halperin, KB Kern, V Wenzel, and DA Chamberlain. New York:  
568 Cambridge University Press; 2007: 426-448. Print.
- 569 32. C.E. Murry, R.B. Jennings, K.A. Reimer. Preconditioning with ischemia: a delay of lethal  
570 cell injury in ischemic myocardium. *Circulation*. 1986; 74: 1124-1136.
- 571 33. P.K. Randhawa, A. Bali, A.S. Jaggi. RIPC for multiorgan salvage in clinical settings:  
572 evolution of concept, evidences and mechanisms. *Eur. J. Pharmacol*. 2015; 746:  
573 317-332.

- 574 34. B.C. Gho, R.G. Schoemaker, M.A. van den Doel, D.J. Duncker, P.D. Verdouw.  
575 Myocardial protection by brief ischemia in noncardiac tissue. *Circulation*. 1996; 94:  
576 2193–2200.
- 577 35. Gessman LJ. Do beta-blockers and ace inhibitors decrease the duration of ventricular  
578 fibrillation, or cause spontaneous conversion of ventricular fibrillation? *Crit Care Med*.  
579 2009; 37: 329-330.
- 580 36. Benjamin EJ, Blaha MJ, Chiuve SE, Cushman M, Das SR, Deo R, et al. American Heart  
581 Association Statistics Committee and Stroke Statistics Subcommittee. Heart Disease and  
582 Stroke Statistics--2017 Update: A Report from the American Heart Association.  
583 *Circulation*. 2017; 135 (10): e146-e603.
- 584 37. Halperin HR, Guerci AD, Chandra N, Herskowitz A, Tsitlik JE, Niskanen RA, et al. L.  
585 Vest inflation without simultaneous ventilation during cardiac arrest in dogs: Improved  
586 survival from prolonged cardiopulmonary resuscitation. *Circulation*. 1986; 74: 1407-  
587 1415.
- 588 38. Halperin HR, Tsitlik JE, Gelfand M, Weisfeldt ML, Gruben KG, Levin HR, et al. A  
589 preliminary study of cardiopulmonary resuscitation by circumferential compression of  
590 the chest with use of a pneumatic vest. *N Engl J Med*. 1993; 329: 762-768.
- 591 39. Paradis NA, Martin GB, Rivers EP, Goetting MG, Appleton TJ, Feingold M, et al.  
592 Coronary perfusion pressure and the return of spontaneous circulation in human  
593 cardiopulmonary resuscitation. *JAMA*. 1990; 263; 1106-1113.
- 594 40. Halperin HR, Tsitlik JE, Guerci AD, Mellits ED, Levin HR, Shi AY, et al. Determinants  
595 of blood flow to vital organs during cardiopulmonary resuscitation in dogs. *Circulation*.  
596 1986; 73: 539-550.
- 597 41. Michael JR, Guerci AD, Koehler RC, Shi AY, Tsitlik J, Chandra N, et al. Mechanisms by  
598 which epinephrine augments cerebral and myocardial perfusion during cardiopulmonary  
599 resuscitation in dogs. *Circulation*. 1984; 69: 822-835.
- 600 42. Aufderheide TP, Pirralo RG, Provo TA, Lurie KG. Clinical evaluation of an inspiratory  
601 impedance threshold device during standard cardiopulmonary resuscitation in patients  
602 with out-of-hospital cardiac arrest. *Crit Care Med*. 2005; 33: 734-740.
- 603 43. Lelovas PP, Kostomitsopoulos NG, Xanthos TT. A Comparative and Physiologic  
604 Overview of the Porcine Heart. *J Am Assoc Lab Anim Sci*. 2014; 53: 432-8.

605

## 606 **Supplementary Digital Content Captions**

607 **Movie S1.** Baseline transthoracic echocardiogram – parasternal long axis view

608 **Movie S2.** Baseline transthoracic echocardiogram – parasternal short axis view

609 **Movie S3.** Pre-Final Occlusion; Chronic Left Ventricular Dysfunction – parasternal long axis

610 view



611 **Movie S4.** Pre-Final Occlusion; Chronic Left Ventricular Dysfunction – parasternal short axis

612 view

613 **Movie S5.** Pulseless Electrical Activity (PEA) during final occlusion – parasternal long axis

614 view

615 **Movie S6.** Pulseless Electrical Activity (PEA) during final occlusion – parasternal short axis

616 view

617

618

| Animal Group                                                                                                                                | Animal ID | SBP (mmHg) | DBP (mmHg) | MAP (mmHg) | HR (bpm) | Time to PEA (mm:ss) | Time to VF (mm:ss) | Duration of PEA (mm:ss) |
|---------------------------------------------------------------------------------------------------------------------------------------------|-----------|------------|------------|------------|----------|---------------------|--------------------|-------------------------|
| Group 1<br>Control<br>No Preconditioning<br>(n = 8)                                                                                         | C650      | 115        | 77         | 90         | 101      | None                | 29:38              | N/A                     |
|                                                                                                                                             | D645      | 94         | 59         | 71         | 84       | None                | 15:14              | N/A                     |
|                                                                                                                                             | E28       | 100        | 68         | 79         | 110      | None                | 21:30              | N/A                     |
|                                                                                                                                             | E150      | 118        | 78         | 91         | 94       | None                | None               | N/A                     |
|                                                                                                                                             | E235      | 103        | 66         | 78         | 107      | None                | 21:55              | N/A                     |
|                                                                                                                                             | G911      | 138        | 86         | 103        | 92       | None                | 15:20              | N/A                     |
|                                                                                                                                             | G916      | 77         | 44         | 51         | 51       | None                | 19:57              | N/A                     |
|                                                                                                                                             | G1018     | 91         | 50         | 64         | 98       | None                | 21:13              | N/A                     |
| <b>Group 1 mean (min) ; for animals that had VF (7/8)</b>                                                                                   |           |            |            |            |          | <b>None</b>         | <b>20.7± 4.9</b>   | <b>N/A</b>              |
| Group 2<br>Single Vessel Ischemic<br>Preconditioning<br>(n = 8)                                                                             | E462      | 109        | 51         | 70         | 64       | None                | None               | N/A                     |
|                                                                                                                                             | E482      | 116        | 65         | 82         | 60       | None                | 31:58              | N/A                     |
|                                                                                                                                             | E483      | 92         | 53         | 66         | 74       | None                | 42:20              | N/A                     |
|                                                                                                                                             | G752      | 116        | 82         | 93         | 107      | None                | None               | N/A                     |
|                                                                                                                                             | G815      | 92         | 68         | 76         | 103      | None                | None               | N/A                     |
|                                                                                                                                             | H63       | 106        | 58         | 74         | 88       | None                | None               | N/A                     |
|                                                                                                                                             | H124      | 94         | 46         | 62         | 95       | None                | None               | N/A                     |
|                                                                                                                                             | H125      | 109        | 67         | 81         | 68       | None                | None               | N/A                     |
| <b>Group 2 mean (min) ; for animals that had VF (2/8)</b>                                                                                   |           |            |            |            |          | <b>None</b>         | <b>37.1±7.3</b>    | <b>N/A</b>              |
| Group 3<br>Acute Ischemia in the setting<br>of significant LV Dysfunction<br>(n = 8)                                                        | G1015     | 100        | 58         | 72         | 83       | 0:17                | 11:29              | 11:12                   |
|                                                                                                                                             | G1062     | 91         | 58         | 69         | 85       | 1:30                | 5:37               | 4:07                    |
|                                                                                                                                             | G1146     | 108        | 66         | 80         | 97       | 1:10                | 22:45              | 21:35                   |
|                                                                                                                                             | G1236     | 85         | 58         | 67         | 103      | 0:58                | 5:36               | 4:38                    |
|                                                                                                                                             | G1288     | 70         | 44         | 53         | 71       | 0:50                | 16:59              | 16:09                   |
|                                                                                                                                             | G1314     | 101        | 68         | 89         | 96       | 2:37                | 11:22              | 8:45                    |
|                                                                                                                                             | H32       | 81         | 53         | 62         | 105      | 3:47                | 12:46              | 8:59                    |
|                                                                                                                                             | H33       | 103        | 61         | 75         | 93       | 0:42                | 17:54              | 17:12                   |
| <b>Group 3 mean (min) ; all animals had PEA with subsequent VF (8/8)</b>                                                                    |           |            |            |            |          | <b>1.5±1.2</b>      | <b>13.1±5.6</b>    | <b>11.6±6.2</b>         |
| Group 4<br>Proximal Ischemic<br>Preconditioning in the setting<br>of significant LV Dysfunction<br>(inadequate 2 min occlusions)<br>(n = 4) | H236      | 92         | 58         | 69         | 81       | 1:56                | 13:24              | 11:28                   |
|                                                                                                                                             | H268      | 97         | 58         | 71         | 88       | 1:33                | 9:38               | 8:05                    |
|                                                                                                                                             | H311      | 82         | 54         | 63         | 99       | 1:13                | 8:29               | 7:16                    |
|                                                                                                                                             | H385      | 87         | 54         | 65         | 86       | 1:20                | 10:44              | 9:24                    |
| <b>Group 4 mean (min) ; all animals had PEA with subsequent VF (4/4)</b>                                                                    |           |            |            |            |          | <b>1.5±0.3</b>      | <b>10.6±2.1</b>    | <b>9.1±1.8</b>          |
| Group 5<br>Distal Ischemic<br>Preconditioning in the setting<br>of significant LV Dysfunction<br>(adequate 3 min occlusions)<br>(n = 6)     | G1017     | 88         | 58         | 68         | 83       | 1:49                | 43:28              | 41:39                   |
|                                                                                                                                             | H237      | 107        | 77         | 87         | 104      | 3:33                | 32:48              | 29:15                   |
|                                                                                                                                             | H461      | 99         | 62         | 74         | 106      | 1:52                | 34:11              | 32:19                   |
|                                                                                                                                             | H463      | 76         | 52         | 60         | 102      | 3:54                | None               | Sustained               |
|                                                                                                                                             | H464      | 70         | 48         | 55         | 132      | 0:49                | None               | Sustained               |
|                                                                                                                                             | H538      | 97         | 57         | 70         | 91       | 1:35                | 24:36              | 23:01                   |
| <b>Group 5 mean (min) ; all animals had PEA (6/6), subsequent VF occurred in 4/6</b>                                                        |           |            |            |            |          | <b>2.2±1.2</b>      | <b>33.7±7.8</b>    | <b>31.5±7.8</b>         |

bioRxiv preprint doi: <https://doi.org/10.1101/468710>; this version posted November 12, 2018. The copyright holder for this preprint (which was not certified by peer review) is the author/funder, who has granted bioRxiv a license to display the preprint in perpetuity. It is made available under aCC-BY 4.0 International license.

Figure 1

## Group 1: No Preconditioning

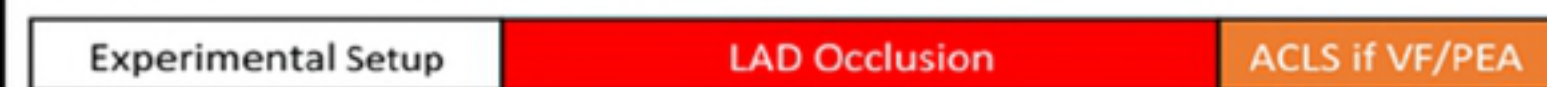

## Group 2: Single Vessel Ischemic Preconditioning

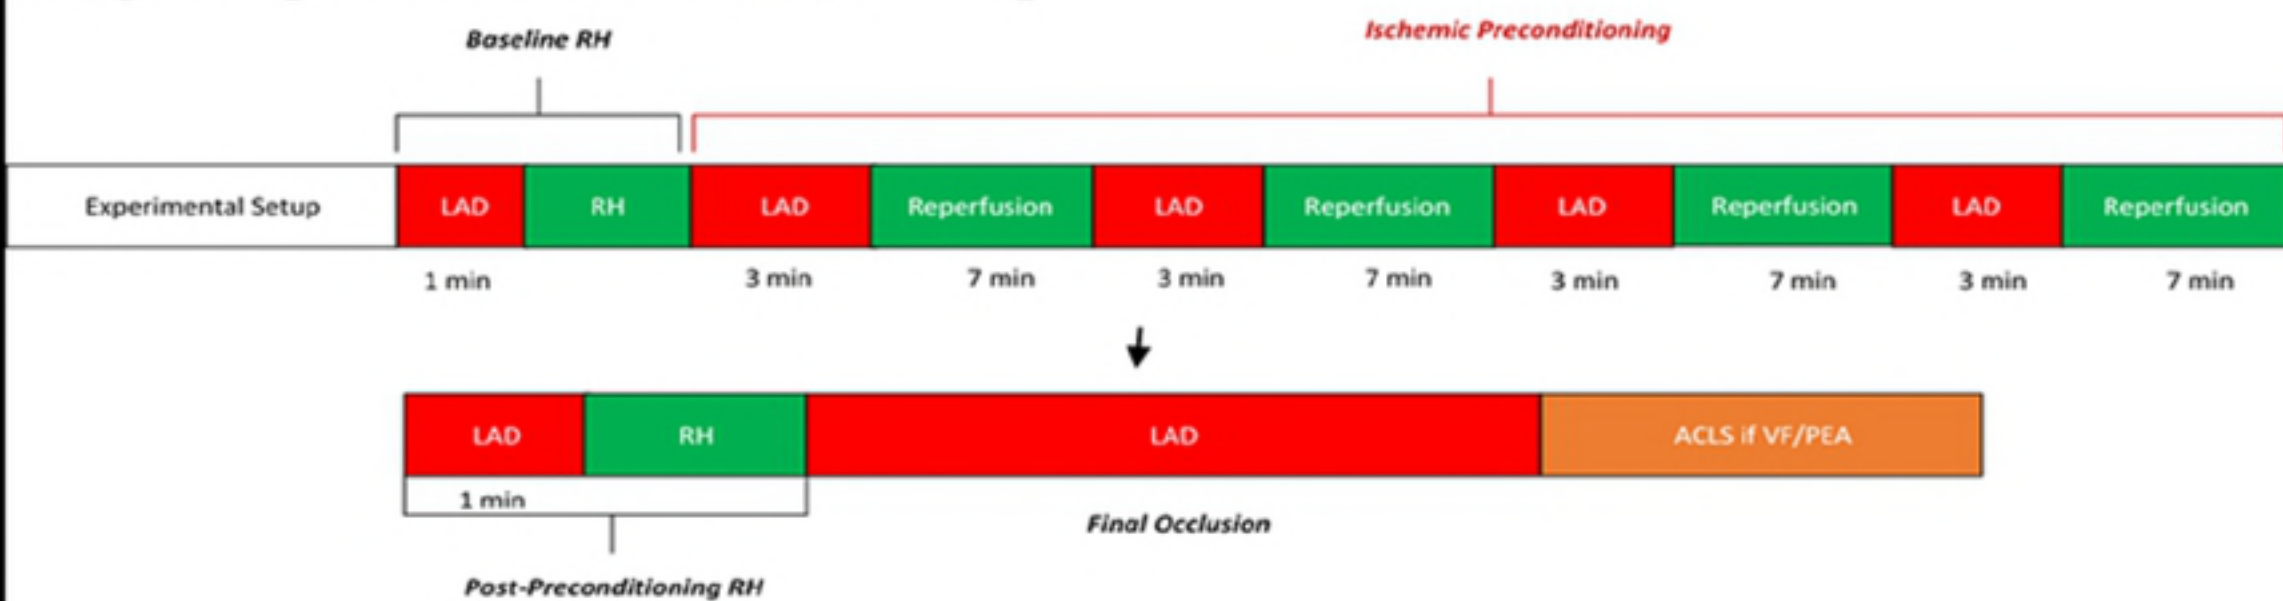

## Group 3: Acute Ischemia in the setting of Significant LV Dysfunction

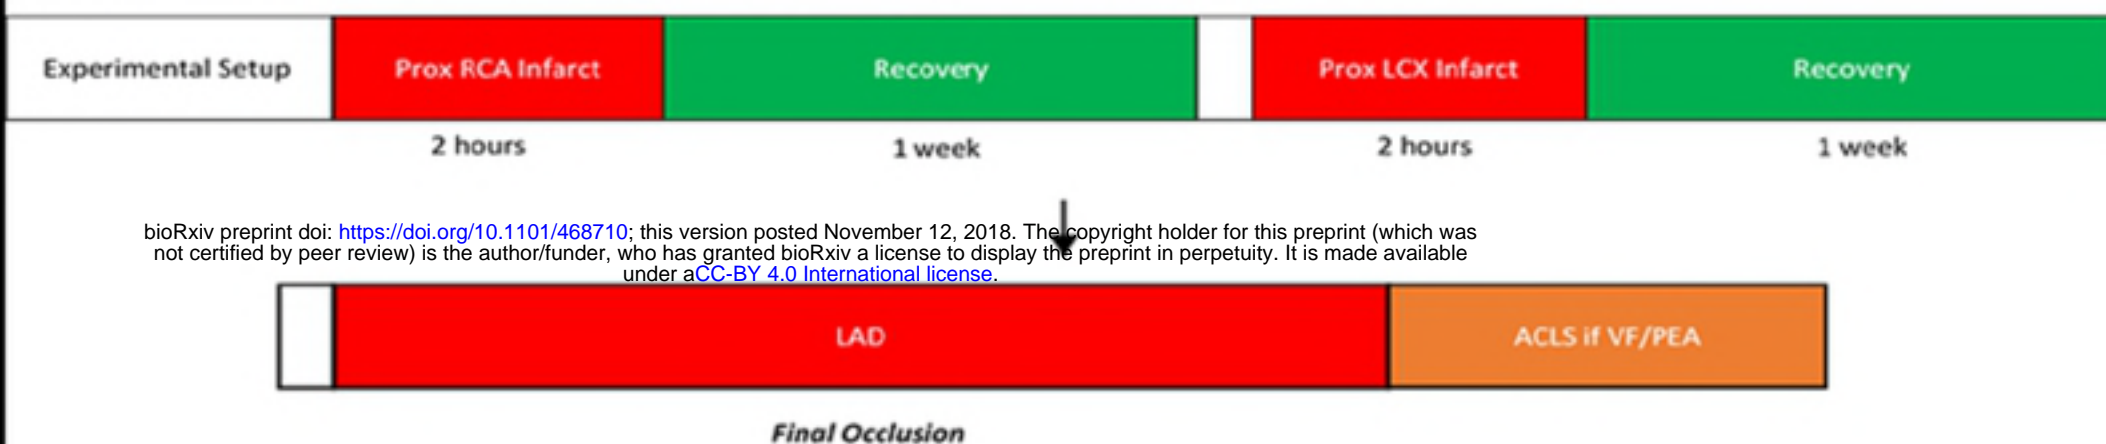

bioRxiv preprint doi: <https://doi.org/10.1101/468710>; this version posted November 12, 2018. The copyright holder for this preprint (which was not certified by peer review) is the author/funder, who has granted bioRxiv a license to display the preprint in perpetuity. It is made available under aCC-BY 4.0 International license.

## Group 4: Proximal Ischemic Preconditioning in the setting of Significant LV Dysfunction

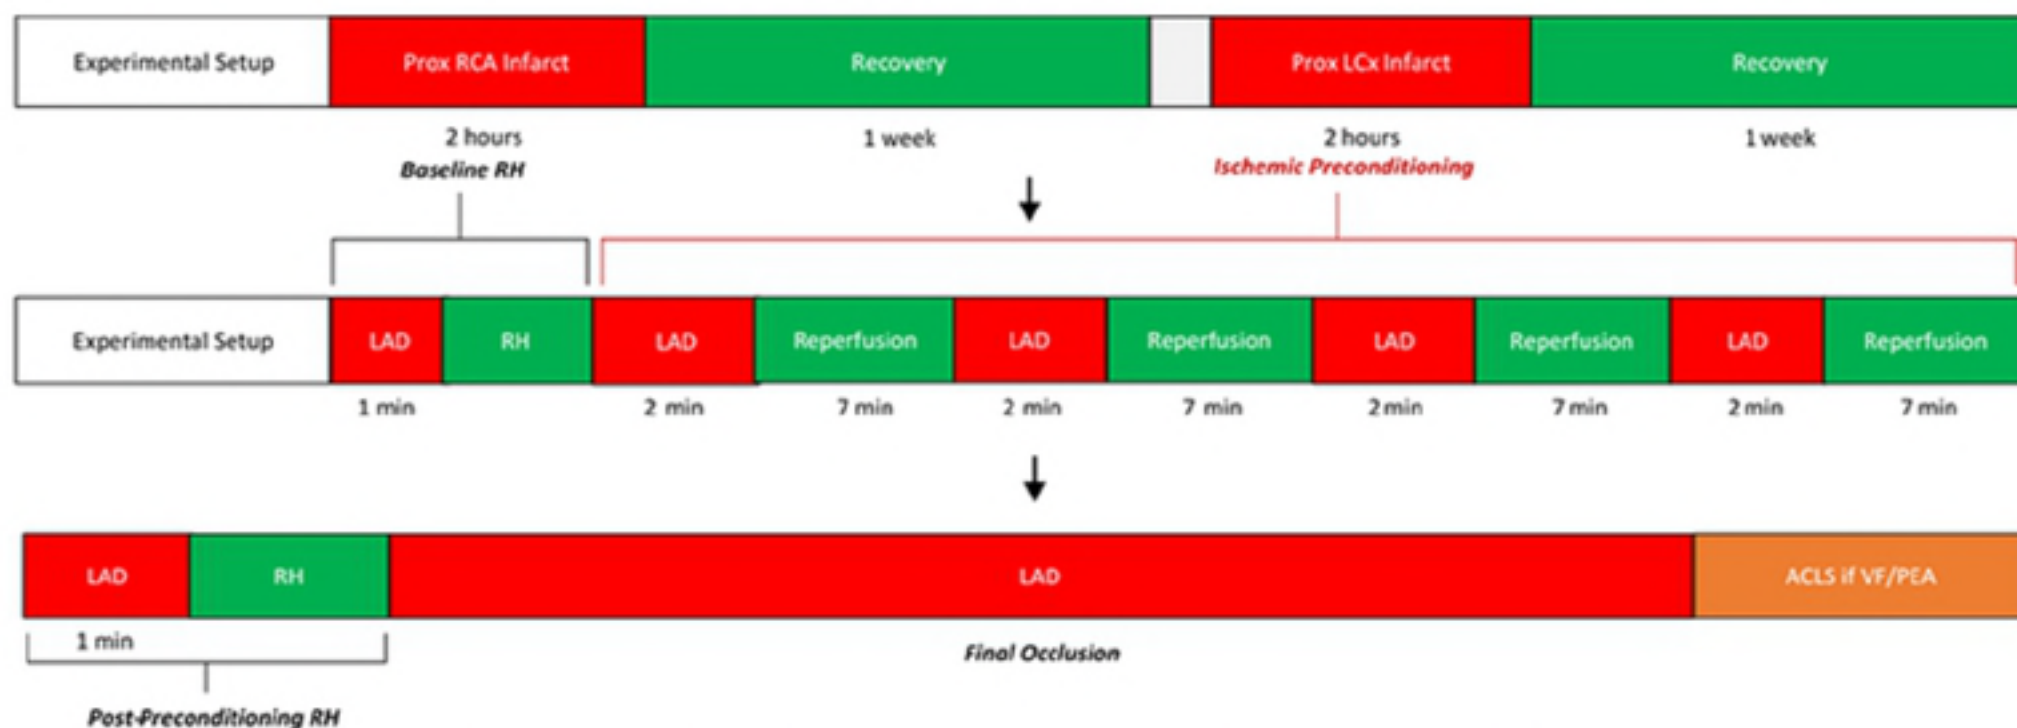

## Group 5: Distal Ischemic Preconditioning in the setting of Significant LV Dysfunction

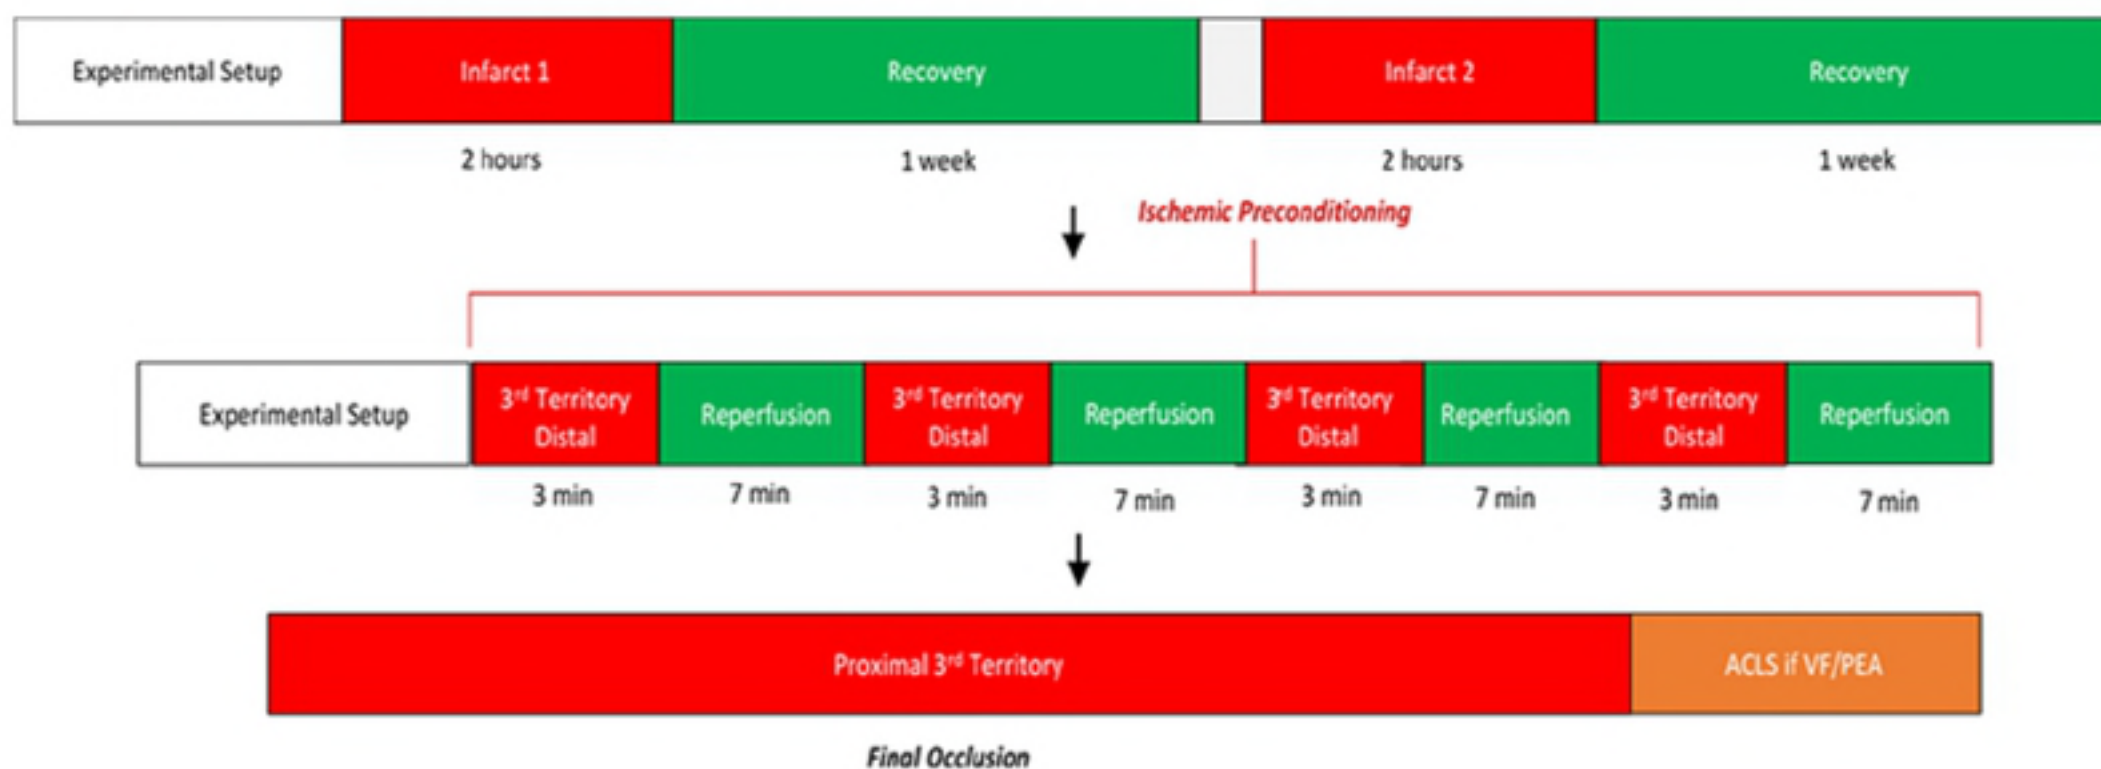

Figure 2

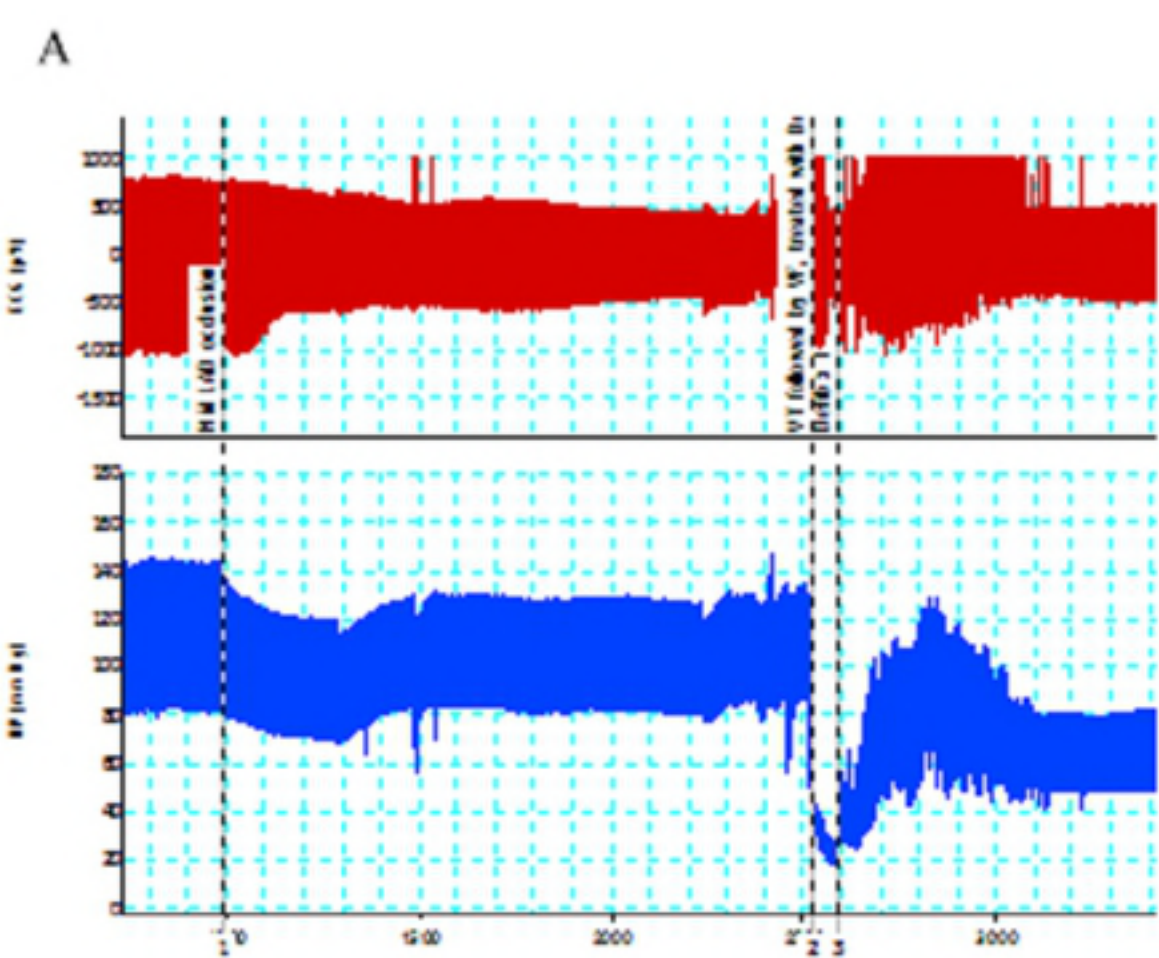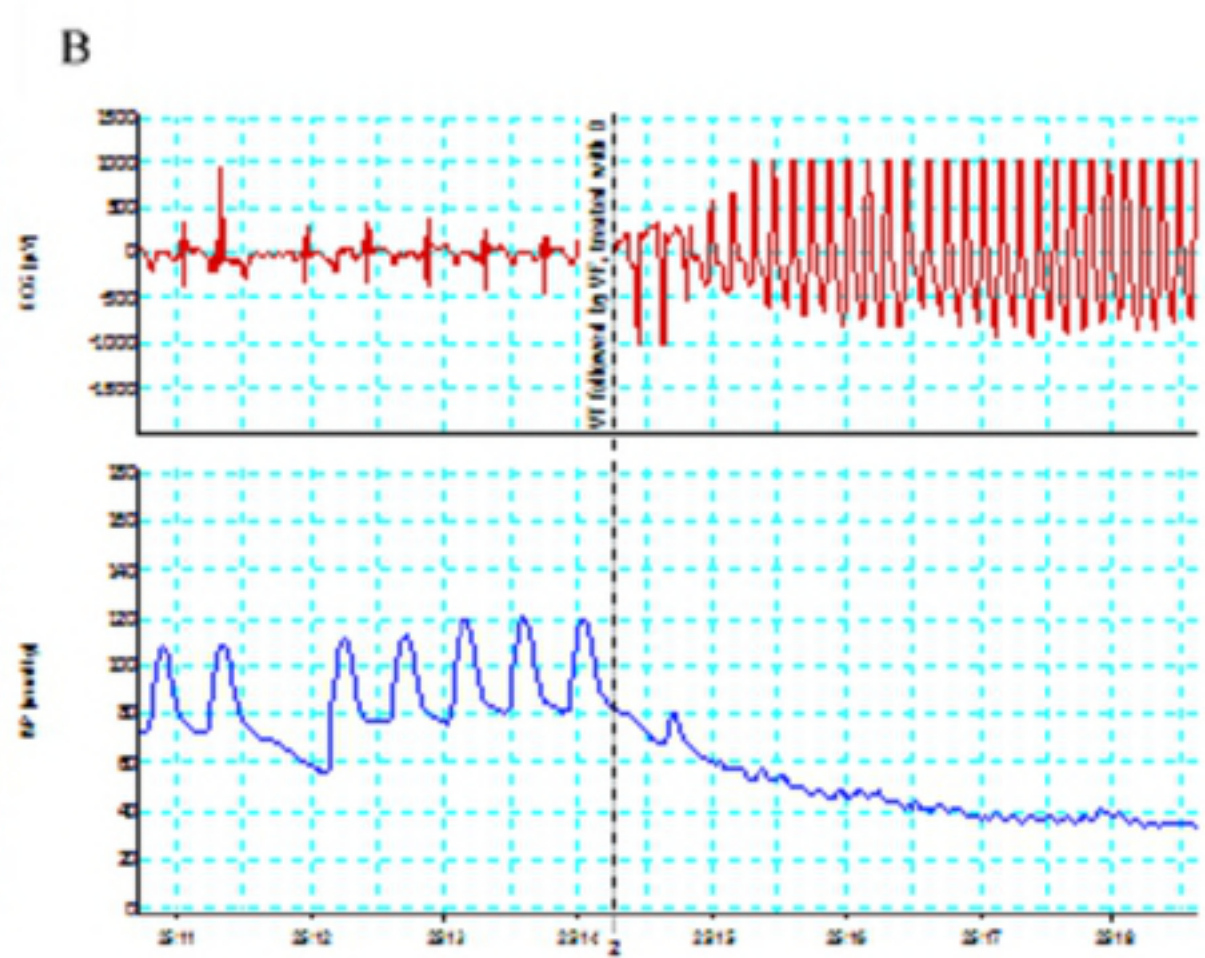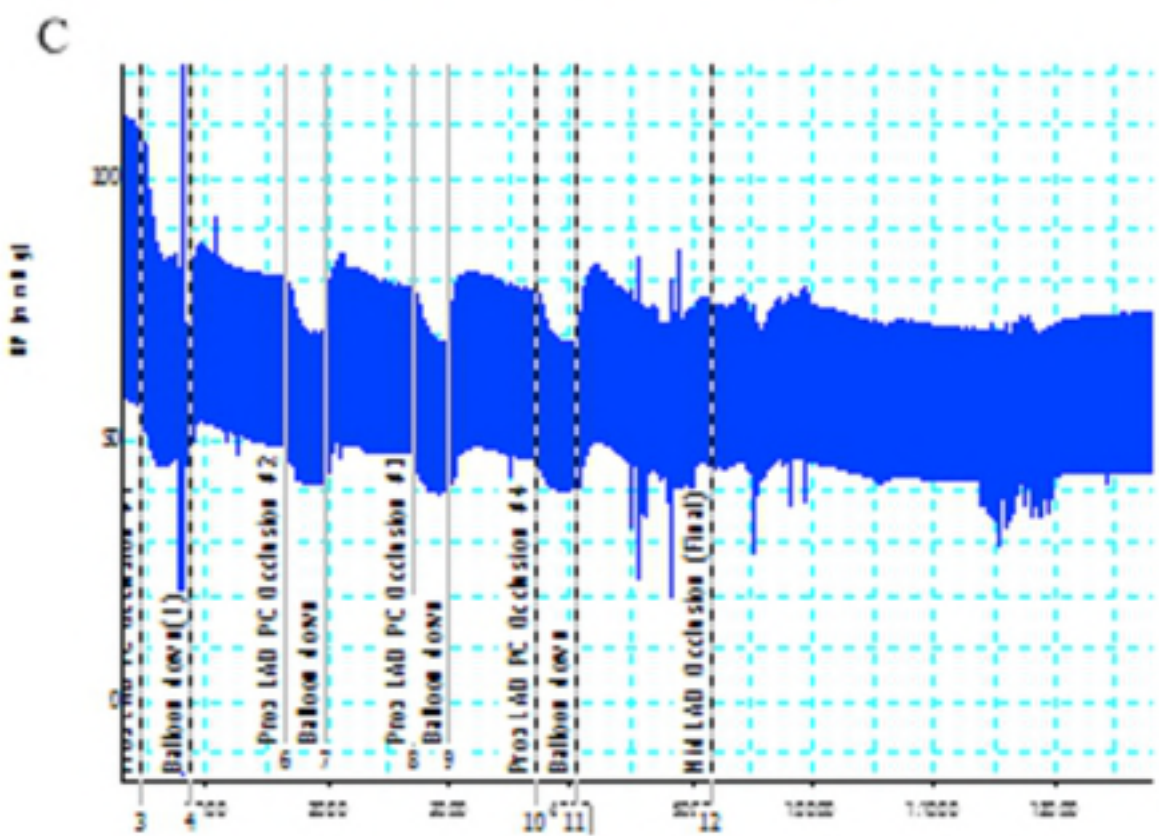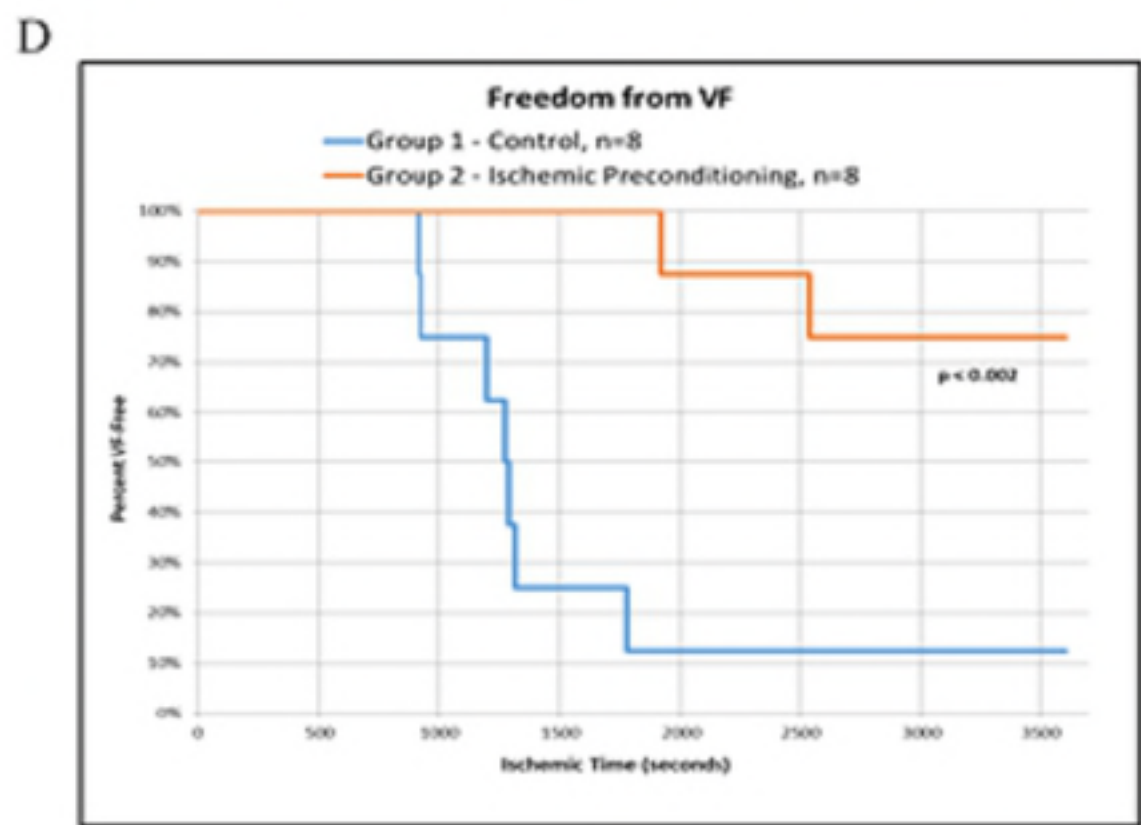

Figure 3

A

## Baseline Reactive Hyperemia Response

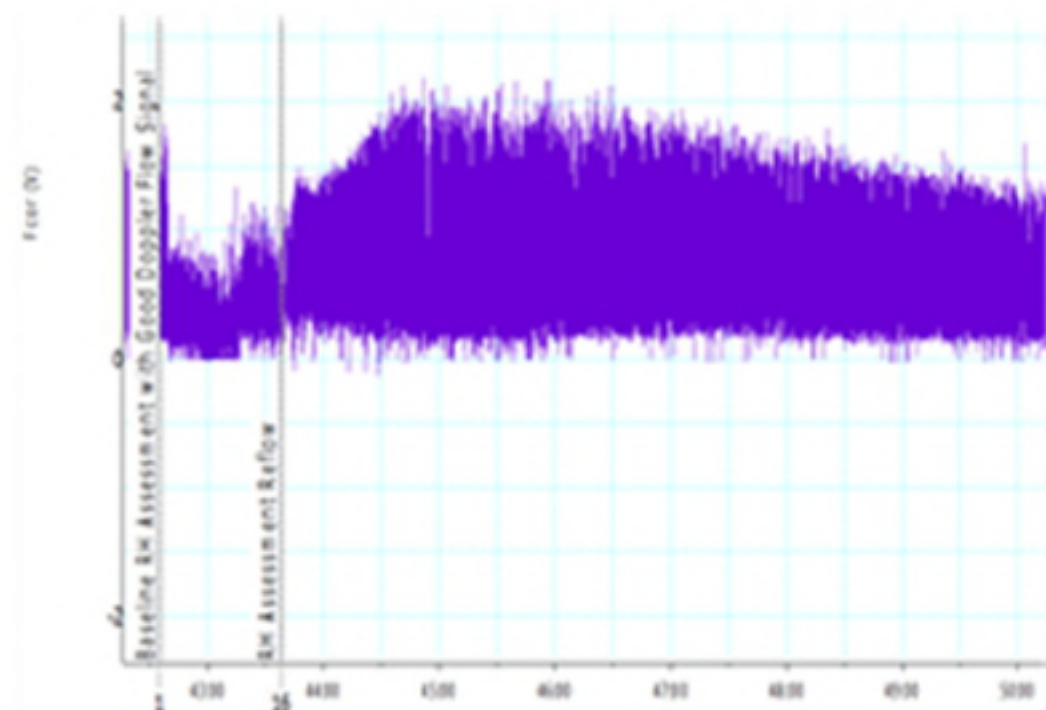

## Reactive Hyperemia Response after IPC

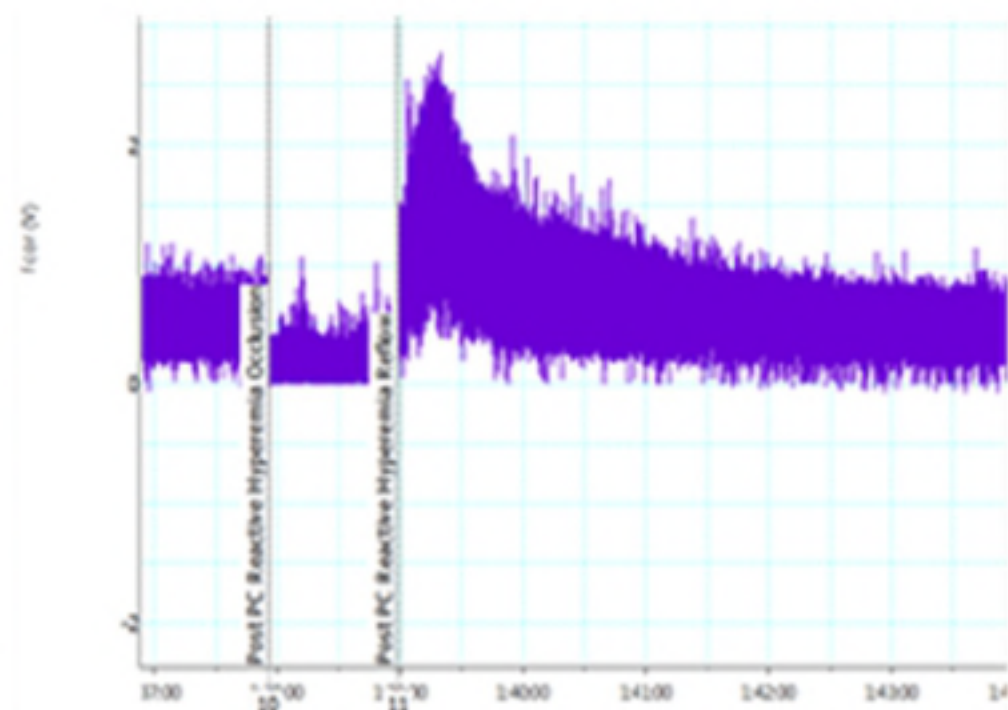

B

## Time to Peak Coronary Flow (n=10)

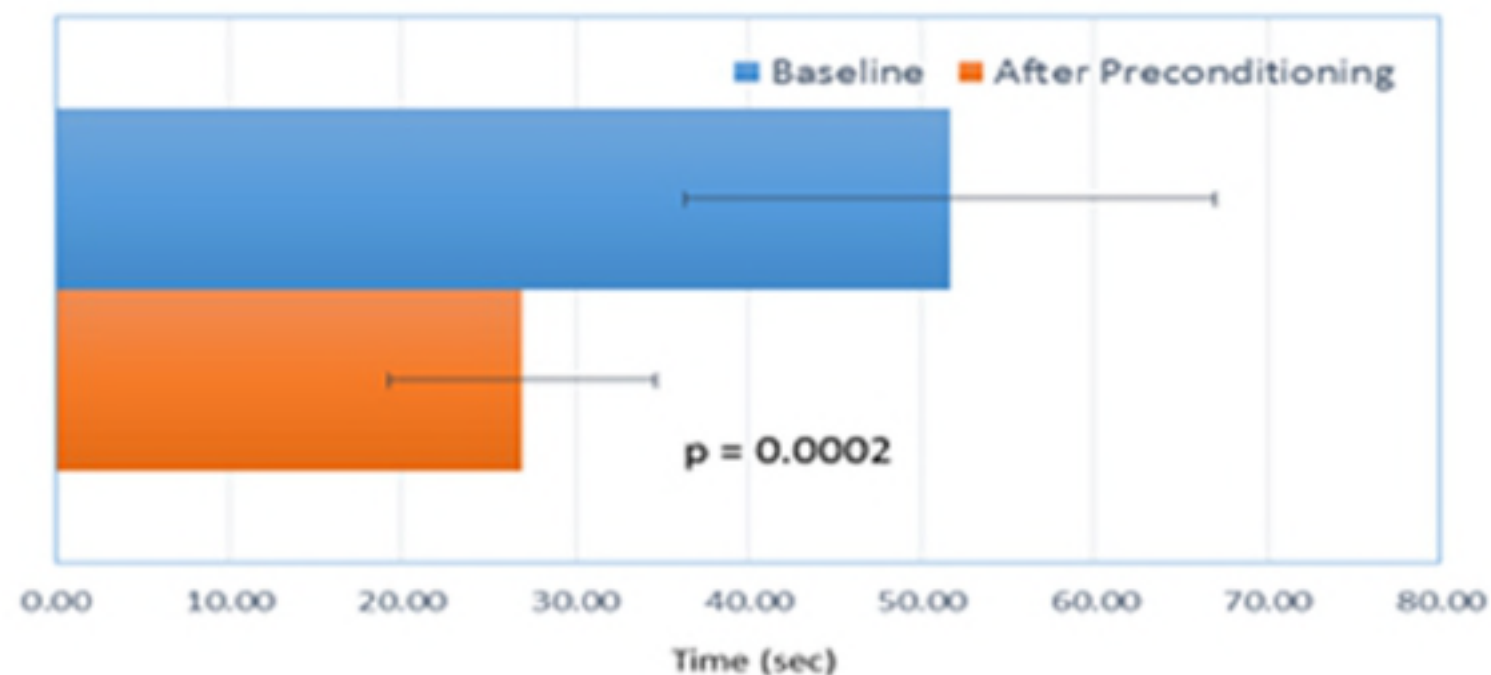

Figure 4

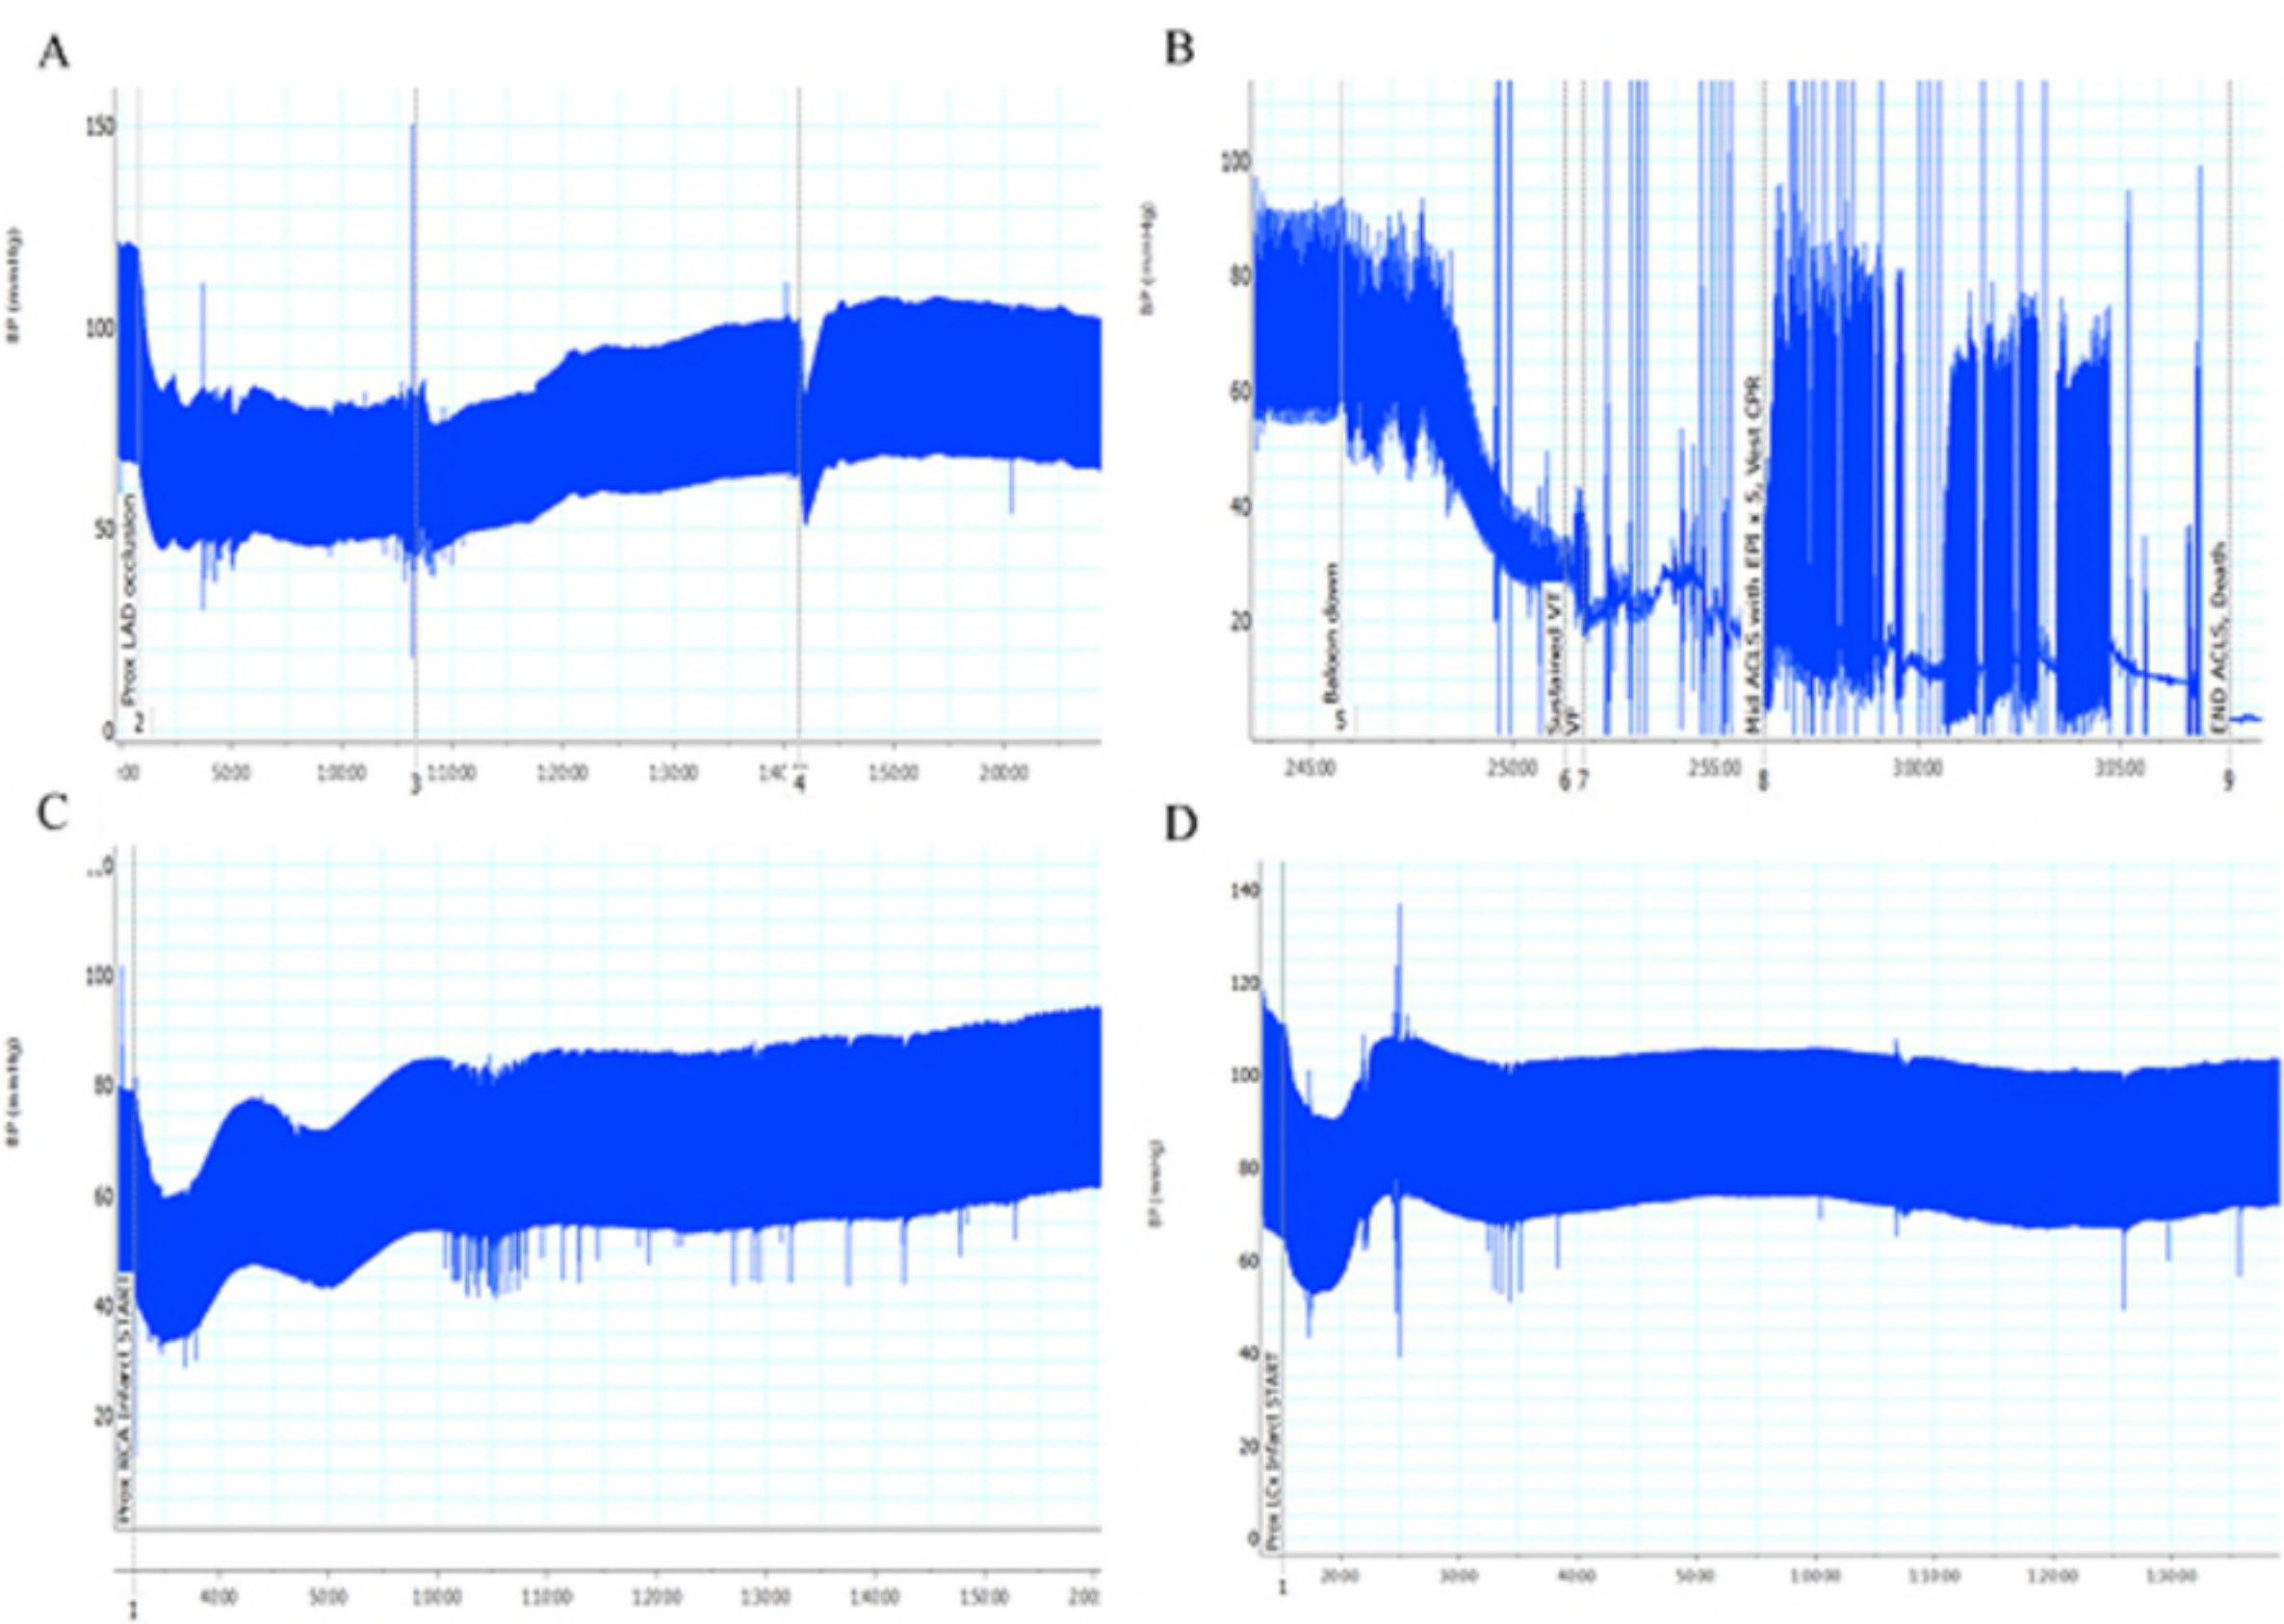

Figure 5

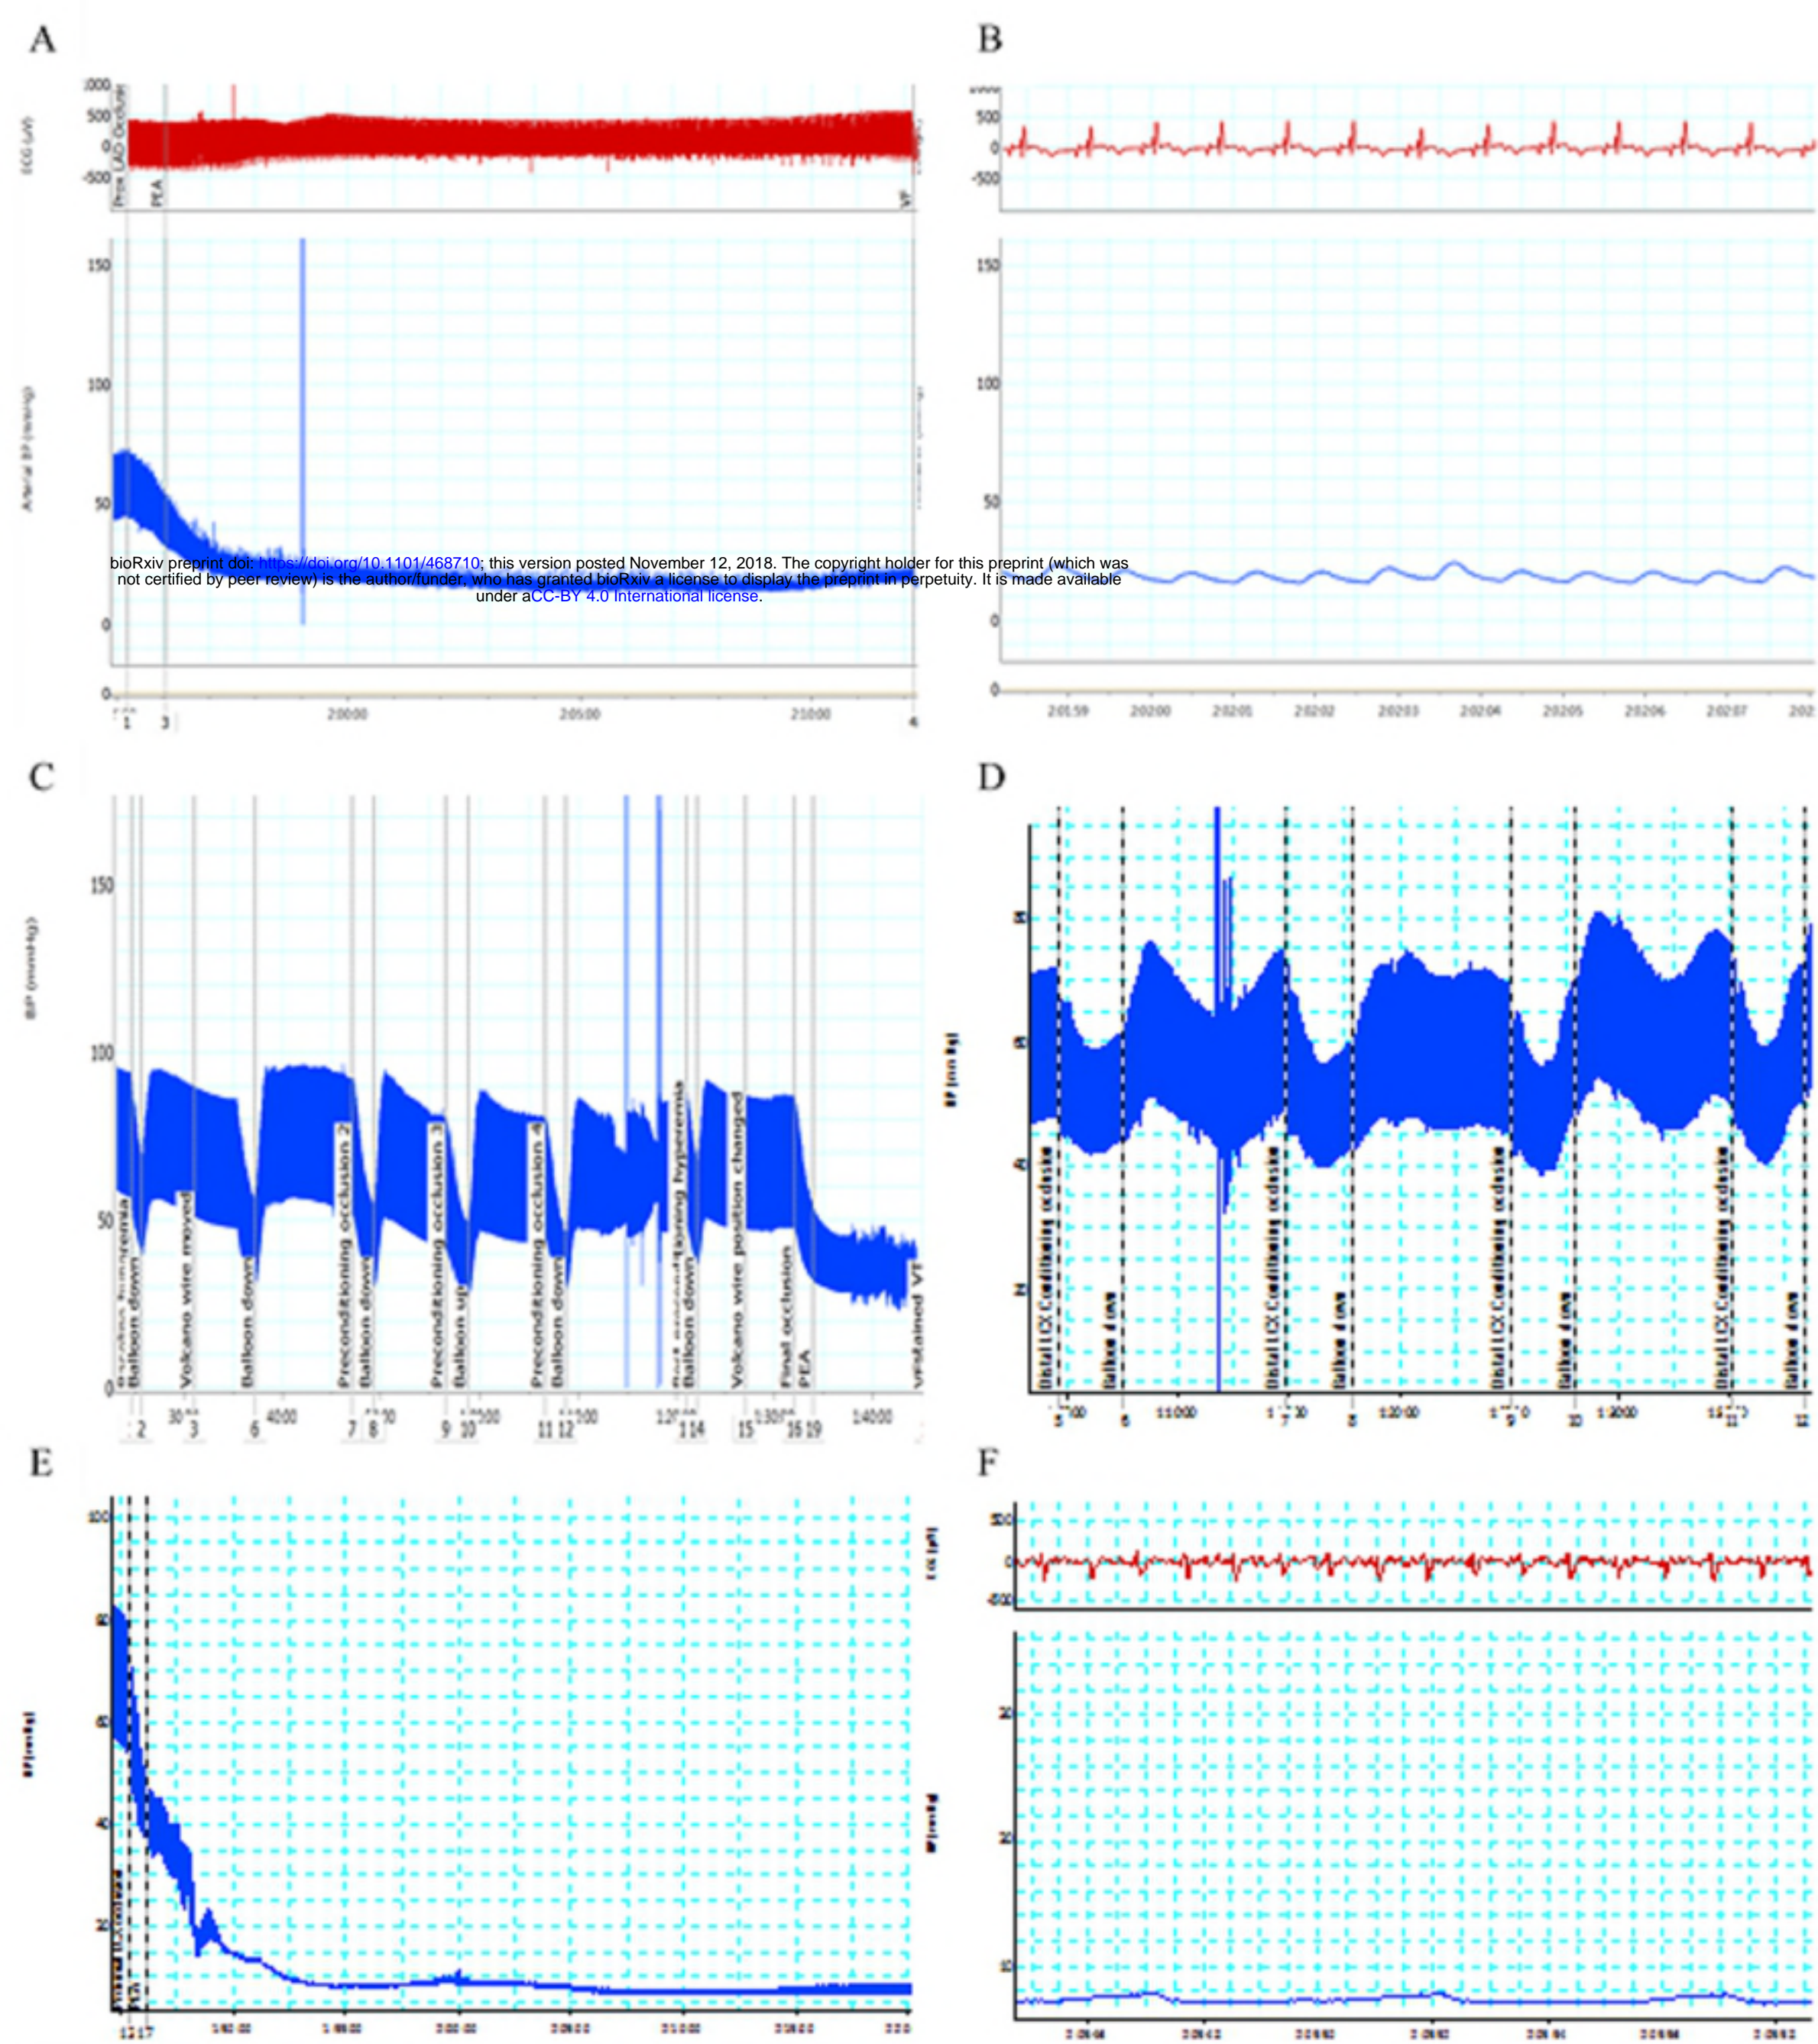

Figure 6

A

## Freedom from VF

bioRxiv preprint doi: <https://doi.org/10.1101/468710>; this version posted November 12, 2018. The copyright holder for this preprint (which was not certified by peer review) is the author/funder, who has granted bioRxiv a license to display the preprint in perpetuity. It is made available under aCC-BY 4.0 International license.

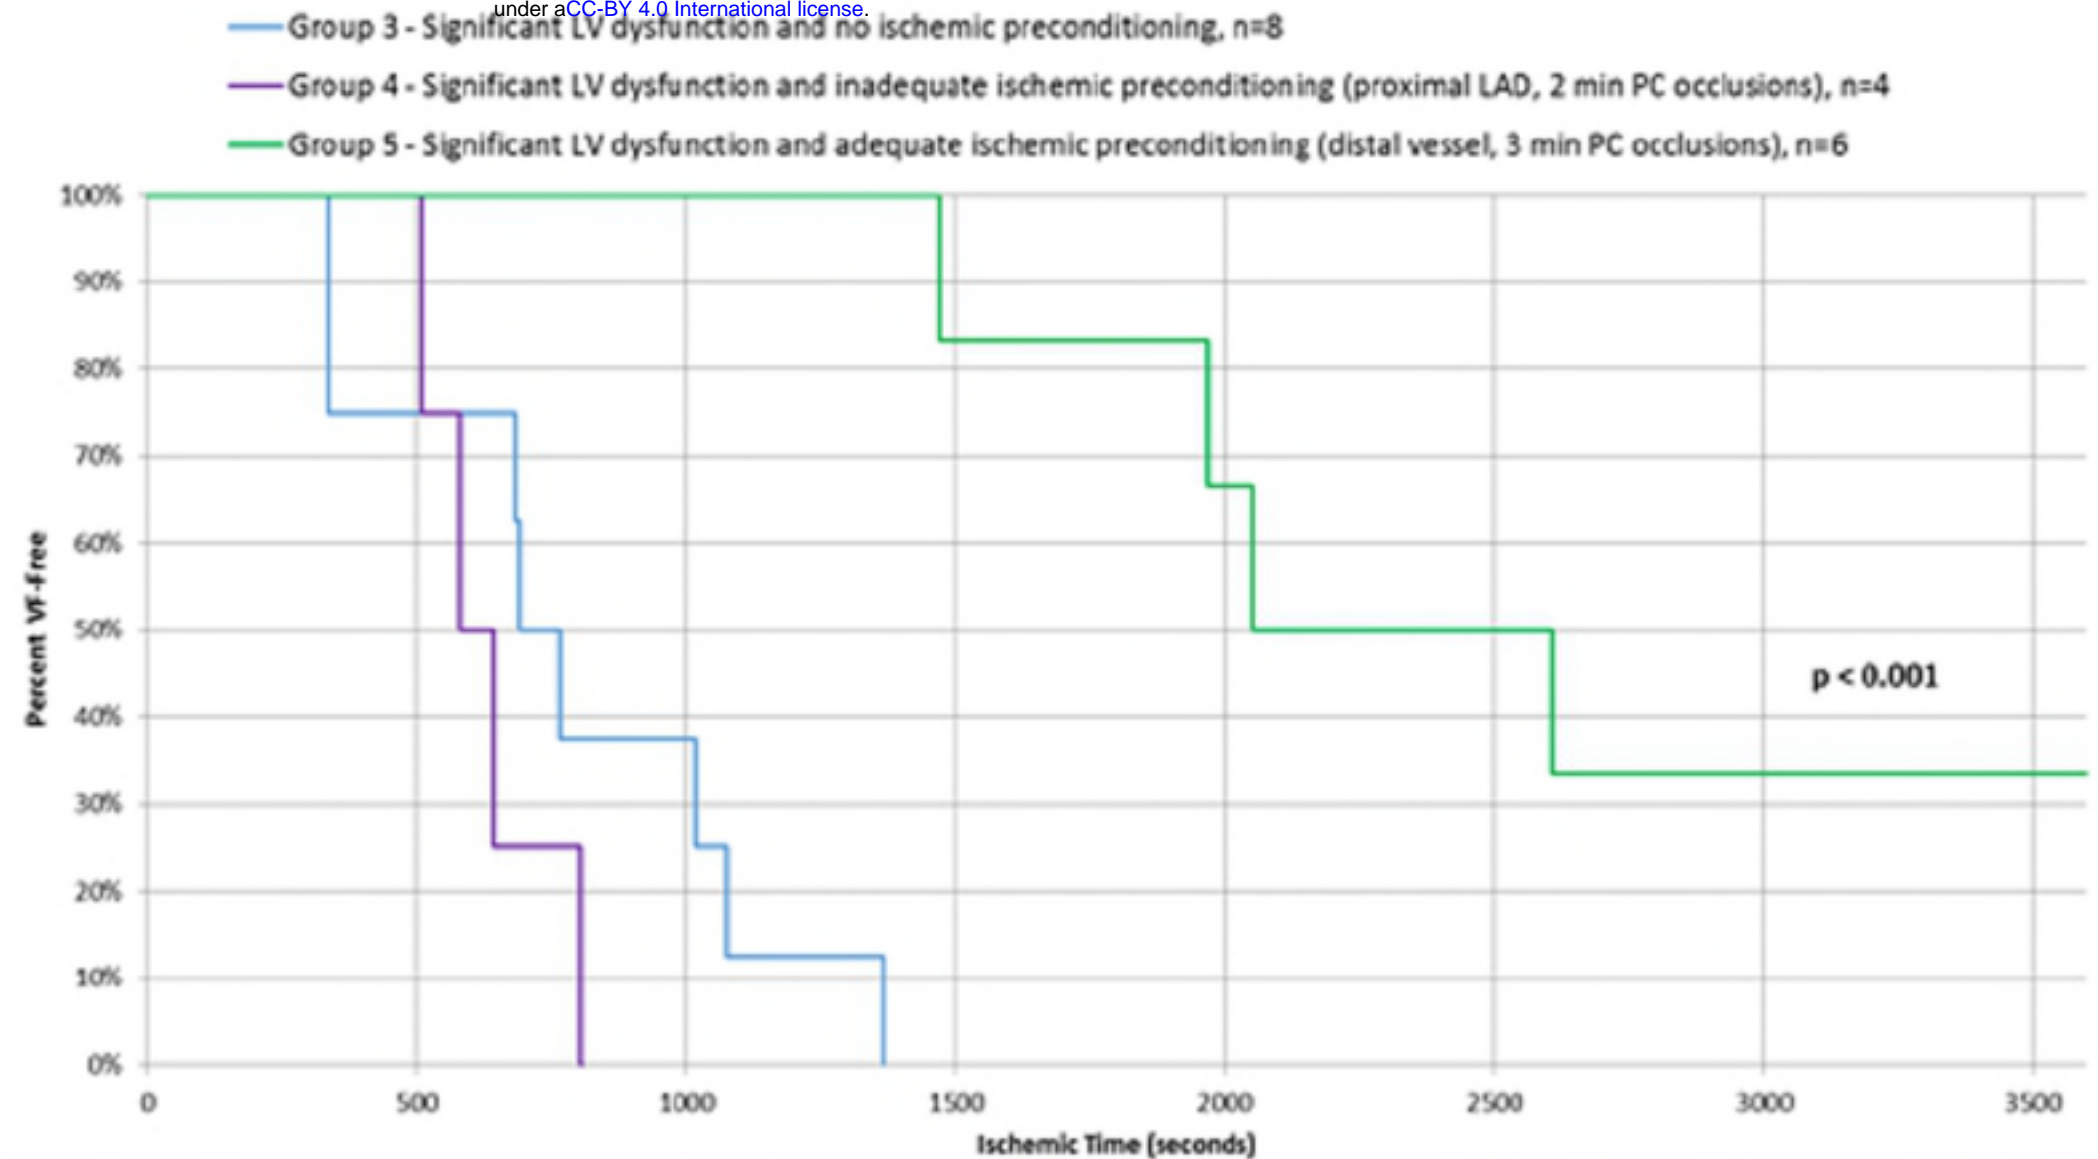

B

|                       | Prior to Final LAD occlusion | During PEA |
|-----------------------|------------------------------|------------|
| Ejection Fraction (%) | $15 \pm 5$                   | $5 \pm 3$  |

  

|                        | Baseline      | During PEA    |
|------------------------|---------------|---------------|
| Cardiac Output (L/min) | $5.0 \pm 0.8$ | $1.6 \pm 0.4$ |

Figure 7



Coronary Artery  
Disease

Angina

- Stable Angina
- Unstable Angina
- Chronic Small Vessel Ischemia

Infarction

Ischemic  
Preconditioning

Left Ventricular  
Dysfunction

Acute Ischemic Insult

Pulseless Electrical  
Activity

Figure 8

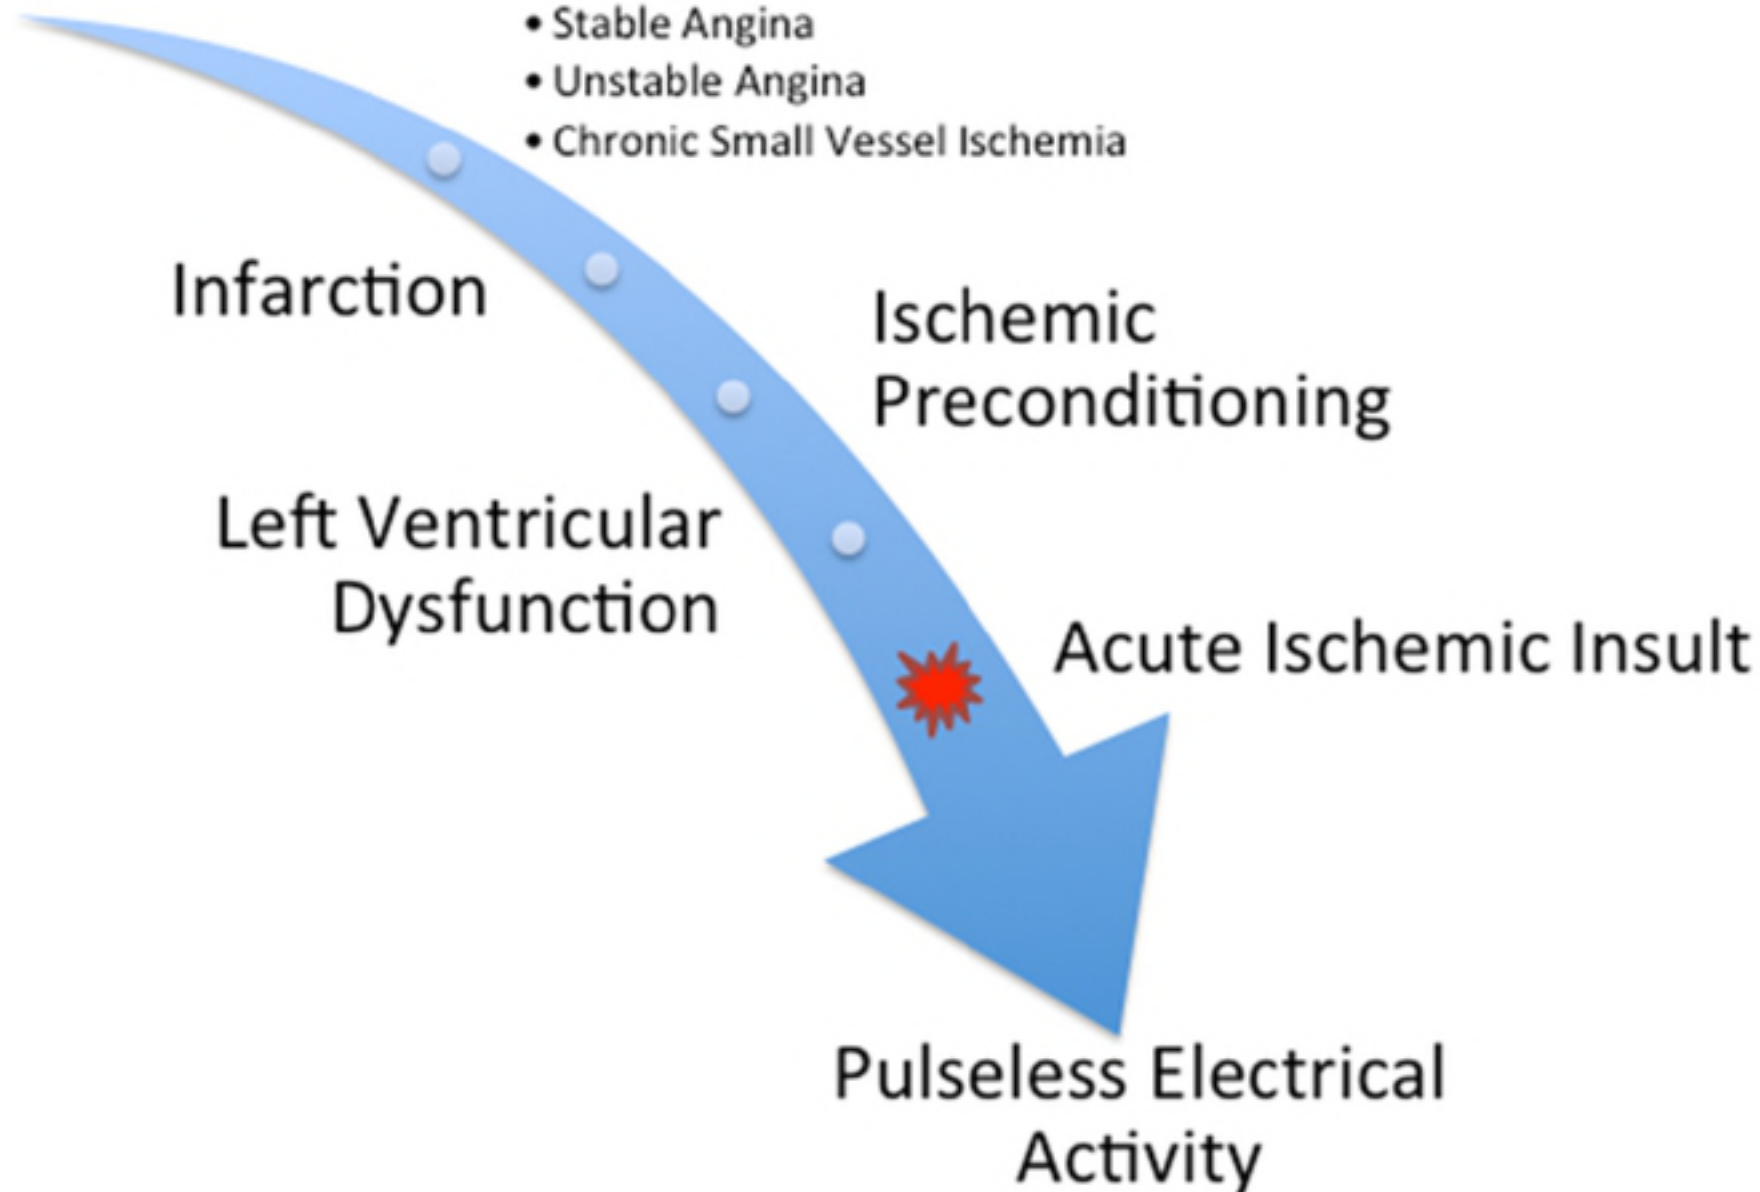

Source: https://www.biorxiv.org/content/10.1101/468710v1.full.pdf
